# Supplementary material for: Extensive Diversity and Evolution of Highly Pathogenic Avian Influenza A (H5) in Poultry in Nigeria, 2021-2022
Source: Preprints.org preprint supplement (doi:10.20944/preprints202305.1027.v1), 2023-05-15
Supplement: Supplementary file 1 [file Virus_SupplTable2.docx]

**Table S2:** Acknowledgment table of the authors, originating and submitting laboratories of the sequences from GISAID’s EpiFlu™ Database on which this research is based in part. The list is detailed below. All submitters of data may be contacted directly via [www.gisaid.org](http://www.gisaid.org)

| **Segment ID** | **Country** | **Collection date** | **Isolate-ID** | **Isolate name** | **Originating Lab** | **Submitting Lab** | **Authors** |
| --- | --- | --- | --- | --- | --- | --- | --- |
| [EPI1995204](https://platform.epicov.org/epi3/start/EPI/1995204) | Niger | 2022-Jan-01 | [EPI_ISL_11007545](https://platform.epicov.org/epi3/start/EPI_ISL/11007545) | A/quail/Niger/22VIR1409-30/2022 | Laboratoire Central de l’Elevage (LABOCEL) | Istituto Zooprofilattico Sperimentale delle Venezie | Souley, M.M.; Yaou, B.; Amadou, H.; Haido, A.M.; Issiako, A.; Alassane, A.; Barbierato, G.; Zecchin, B.; Fusaro, A.; Schivo, A.; Salviato, A.; Palumbo, E.; Giussani, E.; Monne, I.; Terregino, C. |
| [EPI1995196](https://platform.epicov.org/epi3/start/EPI/1995196) | Niger | 2022-Jan-01 | [EPI_ISL_11007544](https://platform.epicov.org/epi3/start/EPI_ISL/11007544) | A/quail/Niger/22VIR1409-28/2022 | Laboratoire Central de l’Elevage (LABOCEL) | Istituto Zooprofilattico Sperimentale delle Venezie | Souley, M.M.; Yaou, B.; Amadou, H.; Haido, A.M.; Issiako, A.; Alassane, A.; Barbierato, G.; Zecchin, B.; Fusaro, A.; Schivo, A.; Salviato, A.; Palumbo, E.; Giussani, E.; Monne, I.; Terregino, C. |
| [EPI2053431](https://platform.epicov.org/epi3/start/EPI/2053431) | Burkina Faso | 2021-Dec-07 | [EPI_ISL_13048382](https://platform.epicov.org/epi3/start/EPI_ISL/13048382) | A/avian/Burkina_Faso/21VIR11911-3/2021 | Laboratoire National d’Elevage | Istituto Zooprofilattico Sperimentale Delle Venezie | LALIDIA-OUOBA, B.; LAMOUNI-ZERBO-OUERMI, H.; Zecchin, B.; Barbierato, G.; OUANDAOGO-SANDAOGO, H.; GUITTI-KINDO, M.; GUIGMA, D.; Barro, N., Palumbo, E.; Giussani, E.; Bortolami, A.; Terregino, C.; Fusaro, A.; Monne, I. |
| [EPI2053423](https://platform.epicov.org/epi3/start/EPI/2053423) | Burkina Faso | 2021-Dec-08 | [EPI_ISL_13048381](https://platform.epicov.org/epi3/start/EPI_ISL/13048381) | A/avian/Burkina_Faso/21VIR11911-1/2021 | Laboratoire National d’Elevage | Istituto Zooprofilattico Sperimentale Delle Venezie | LALIDIA-OUOBA, B.; LAMOUNI-ZERBO-OUERMI, H.; Zecchin, B.; Barbierato, G.; OUANDAOGO-SANDAOGO, H.; GUITTI-KINDO, M.; GUIGMA, D.; Barro, N., Palumbo, E.; Giussani, E.; Bortolami, A.; Terregino, C.; Fusaro, A.; Monne, I. |
| [EPI1995220](https://platform.epicov.org/epi3/start/EPI/1995220) | Niger | 2022-Jan-01 | [EPI_ISL_11007547](https://platform.epicov.org/epi3/start/EPI_ISL/11007547) | A/chicken/Niger/22VIR1409-9/2022 | Laboratoire Central de l’Elevage (LABOCEL) | Istituto Zooprofilattico Sperimentale delle Venezie | Souley, M.M.; Yaou, B.; Amadou, H.; Haido, A.M.; Issiako, A.; Alassane, A.; Barbierato, G.; Zecchin, B.; Fusaro, A.; Schivo, A.; Salviato, A.; Palumbo, E.; Giussani, E.; Monne, I.; Terregino, C. |
| [EPI1995212](https://platform.epicov.org/epi3/start/EPI/1995212) | Niger | 2022-Jan-01 | [EPI_ISL_11007546](https://platform.epicov.org/epi3/start/EPI_ISL/11007546) | A/chicken/Niger/22VIR1409-5/2022 | Laboratoire Central de l’Elevage (LABOCEL) | Istituto Zooprofilattico Sperimentale delle Venezie | Souley, M.M.; Yaou, B.; Amadou, H.; Haido, A.M.; Issiako, A.; Alassane, A.; Barbierato, G.; Zecchin, B.; Fusaro, A.; Schivo, A.; Salviato, A.; Palumbo, E.; Giussani, E.; Monne, I.; Terregino, C. |
| [EPI1995188](https://platform.epicov.org/epi3/start/EPI/1995188) | Niger | 2022-Jan-01 | [EPI_ISL_11007543](https://platform.epicov.org/epi3/start/EPI_ISL/11007543) | A/chicken/Niger/22VIR1409-23/2022 | Laboratoire Central de l’Elevage (LABOCEL) | Istituto Zooprofilattico Sperimentale delle Venezie | Souley, M.M.; Yaou, B.; Amadou, H.; Haido, A.M.; Issiako, A.; Alassane, A.; Barbierato, G.; Zecchin, B.; Fusaro, A.; Schivo, A.; Salviato, A.; Palumbo, E.; Giussani, E.; Monne, I.; Terregino, C. |
| [EPI1995180](https://platform.epicov.org/epi3/start/EPI/1995180) | Niger | 2022-Jan-01 | [EPI_ISL_11007542](https://platform.epicov.org/epi3/start/EPI_ISL/11007542) | A/chicken/Niger/22VIR1409-13/2022 | Laboratoire Central de l’Elevage (LABOCEL) | Istituto Zooprofilattico Sperimentale delle Venezie | Souley, M.M.; Yaou, B.; Amadou, H.; Haido, A.M.; Issiako, A.; Alassane, A.; Barbierato, G.; Zecchin, B.; Fusaro, A.; Schivo, A.; Salviato, A.; Palumbo, E.; Giussani, E.; Monne, I.; Terregino, C. |
| [EPI2193007](https://platform.epicov.org/epi3/start/EPI/2193007) | Ghana | 2021-Jun-08 | [EPI_ISL_15350905](https://platform.epicov.org/epi3/start/EPI_ISL/15350905) | A/chicken/Ghana/AVL-763_21VIR7050-39/2021 | Veterinary Services Directorate, Ministry of Food and Agriculture | Istituto Zooprofilattico Sperimentale delle Venezie | Odoom, T.; Ababio, P.T.; Danso, F.; Abakeh, P.; Youri, G.M.; Fia, G.E.; Yingar, D.T.; Daniel, B.; Arthur, D.; Kutame, M.S.; Barbierato, G.; Zecchin, B.; Fusaro, A.; Schivo, A.; Salviato, A.; Palumbo, E.; Giussani, E.; Pastori, A.; Monne, I.; Terregino, C. |
| [EPI2146037](https://platform.epicov.org/epi3/start/EPI/2146037) | Lesotho | 2021-Jun-05 | [EPI_ISL_14769967](https://platform.epicov.org/epi3/start/EPI_ISL/14769967) | A/chicken/Lesotho/352.3/2021 |  | Import from public-domain | Makalo,M.R.; Dundon,W.G.; Settypalli,T.B.; Datta,S.; Lamien,C.E.; Cattoli,G.; Phalatsi,M.S.; Lepheana,R.J.; Matlali,M.; Mahloane,R.G.; Molomo,M.; Mphaka,P.C. |
| [EPI2146029](https://platform.epicov.org/epi3/start/EPI/2146029) | Lesotho | 2021-May-29 | [EPI_ISL_14769966](https://platform.epicov.org/epi3/start/EPI_ISL/14769966) | A/chicken/Lesotho/341.10/2021 |  | Import from public-domain | Makalo,M.R.; Dundon,W.G.; Settypalli,T.B.; Datta,S.; Lamien,C.E.; Cattoli,G.; Phalatsi,M.S.; Lepheana,R.J.; Matlali,M.; Mahloane,R.G.; Molomo,M.; Mphaka,P.C. |
| [EPI1896085](https://platform.epicov.org/epi3/start/EPI/1896085) | Nigeria | 2021-Feb-12 | [EPI_ISL_4061491](https://platform.epicov.org/epi3/start/EPI_ISL/4061491) | A/chicken/Nigeria/VRD21-98_21VIR2288-6/2021 |  | Import from public-domain | Shittu,I.; Meseko,C.; Nwosuh,C.; Muhammad,M.; Alabi,O.; Tassoni,L.; Schivo,A.; Salviato,A.; Edoardo,G.; Zecchin,B.; Fusaro,A.; Monne,I. |
| [EPI1898064](https://platform.epicov.org/epi3/start/EPI/1898064) | Nigeria | 2021-Feb-25 | [EPI_ISL_4061490](https://platform.epicov.org/epi3/start/EPI_ISL/4061490) | A/chicken/Nigeria/VRD21-88_21VIR2288-8/2021 |  | Import from public-domain | Shittu,I.; Meseko,C.; Nwosuh,C.; Muhammad,M.; Alabi,O.; Tassoni,L.; Schivo,A.; Salviato,A.; Edoardo,G.; Zecchin,B.; Fusaro,A.; Monne,I. |
| [EPI1896077](https://platform.epicov.org/epi3/start/EPI/1896077) | Nigeria | 2021-Feb-11 | [EPI_ISL_4061488](https://platform.epicov.org/epi3/start/EPI_ISL/4061488) | A/chicken/Nigeria/VRD21-53B_21VIR2288-5/2021 |  | Import from public-domain | Shittu,I.; Meseko,C.; Nwosuh,C.; Muhammad,M.; Alabi,O.; Tassoni,L.; Schivo,A.; Salviato,A.; Edoardo,G.; Zecchin,B.; Fusaro,A.; Monne,I. |
| [EPI1896075](https://platform.epicov.org/epi3/start/EPI/1896075) | Nigeria | 2021-Feb-05 | [EPI_ISL_4061486](https://platform.epicov.org/epi3/start/EPI_ISL/4061486) | A/chicken/Nigeria/VRD21-37_21VIR2288-2/2021 |  | Import from public-domain | Shittu,I.; Meseko,C.; Nwosuh,C.; Muhammad,M.; Alabi,O.; Tassoni,L.; Schivo,A.; Salviato,A.; Edoardo,G.; Zecchin,B.; Fusaro,A.; Monne,I. |
| [EPI1896066](https://platform.epicov.org/epi3/start/EPI/1896066) | Nigeria | 2021-Mar-01 | [EPI_ISL_4061485](https://platform.epicov.org/epi3/start/EPI_ISL/4061485) | A/chicken/Nigeria/VRD21-109_21VIR2370-425/2021 |  | Import from public-domain | Shittu,I.; Meseko,C.; Nwosuh,C.; Muhammad,M.; Alabi,O.; Tassoni,L.; Schivo,A.; Salviato,A.; Edoardo,G.; Zecchin,B.; Fusaro,A.; Monne,I. |
| [EPI1896058](https://platform.epicov.org/epi3/start/EPI/1896058) | Nigeria | 2021-Mar-01 | [EPI_ISL_4061484](https://platform.epicov.org/epi3/start/EPI_ISL/4061484) | A/chicken/Nigeria/VRD21-102_21VIR2370-424/2021 |  | Import from public-domain | Shittu,I.; Meseko,C.; Nwosuh,C.; Muhammad,M.; Alabi,O.; Tassoni,L.; Schivo,A.; Salviato,A.; Edoardo,G.; Zecchin,B.; Fusaro,A.; Monne,I. |
| [EPI1896050](https://platform.epicov.org/epi3/start/EPI/1896050) | Nigeria | 2021-Mar-01 | [EPI_ISL_4061483](https://platform.epicov.org/epi3/start/EPI_ISL/4061483) | A/chicken/Nigeria/VRD21-100_21VIR2370-423/2021 |  | Import from public-domain | Shittu,I.; Meseko,C.; Nwosuh,C.; Muhammad,M.; Alabi,O.; Tassoni,L.; Schivo,A.; Salviato,A.; Edoardo,G.; Zecchin,B.; Fusaro,A.; Monne,I. |
| [EPI1896042](https://platform.epicov.org/epi3/start/EPI/1896042) | Nigeria | 2021-Feb-05 | [EPI_ISL_4061482](https://platform.epicov.org/epi3/start/EPI_ISL/4061482) | A/chicken/Nigeria/VRD21-035B_21VIR2288-1/2021 |  | Import from public-domain | Shittu,I.; Meseko,C.; Nwosuh,C.; Muhammad,M.; Alabi,O.; Tassoni,L.; Schivo,A.; Salviato,A.; Edoardo,G.; Zecchin,B.; Fusaro,A.; Monne,I. |
| [EPI1896034](https://platform.epicov.org/epi3/start/EPI/1896034) | Nigeria | 2021-Feb-10 | [EPI_ISL_4061481](https://platform.epicov.org/epi3/start/EPI_ISL/4061481) | A/chicken/Nigeria/VRD21-43_21VIR2288-4/2021 |  | Import from public-domain | Shittu,I.; Meseko,C.; Nwosuh,C.; Muhammad,M.; Alabi,O.; Tassoni,L.; Schivo,A.; Salviato,A.; Edoardo,G.; Zecchin,B.; Fusaro,A.; Monne,I. |
| [EPI2415855](https://platform.epicov.org/epi3/start/EPI/2415855) | Ghana | 2021-Jun-08 | [EPI_ISL_16997921](https://platform.epicov.org/epi3/start/EPI_ISL/16997921) | A/chicken/Ghana/AVL-763_21VIR7050-39/2021 | Veterinary Services Directorate, Ministry of Food and Agriculture | Istituto Zooprofilattico Sperimentale Delle Venezie | Odoom,T.; Ababio,P.T.; Danso,F.; Abakeh,P.; Youri,G.M.; Fia,G.E.; Yingar,D.T.; Daniel,B.; Arthur,D.; Kutame,M.S.; Barbierato,G.; Zecchin,B.; Fusaro,A.; Schivo,A.; Salviato,A.; Palumbo,E.; Giussani,E.; Pastori,A.; Monne,I.; Terregino,C. |
| [EPI1866465](https://platform.epicov.org/epi3/start/EPI/1866465) | Senegal | 2020-Dec-23 | [EPI_ISL_2276070](https://platform.epicov.org/epi3/start/EPI_ISL/2276070) | A/chicken/Senegal/21VIR1084-5/2021 | Istituto Zooprofilattico Sperimentale delle Venezie, EU/OIE/Reference Laboratory and FAO Reference Centre for AI and ND | Istituto Zooprofilattico Sperimentale Delle Venezie | Lo, F.T.; Diallo, A.A.; Ba, R.O.; Diouf, M.; Diop, A.; Samb, Y.N.; Diouf, M.; Diop, M.; Lo, M.M.; Diouf, M.N.; Zecchin, B.; Tassoni, L.; Fusaro, A.; Pastori, A.; Monne, I.; Terregino, C. |
| [EPI1866457](https://platform.epicov.org/epi3/start/EPI/1866457) | Senegal | 2020-Dec-23 | [EPI_ISL_2276069](https://platform.epicov.org/epi3/start/EPI_ISL/2276069) | A/chicken/Senegal/21VIR1084-4/2021 | Istituto Zooprofilattico Sperimentale delle Venezie, EU/OIE/Reference Laboratory and FAO Reference Centre for AI and ND | Istituto Zooprofilattico Sperimentale Delle Venezie | Lo, F.T.; Diallo, A.A.; Ba, R.O.; Diouf, M.; Diop, A.; Samb, Y.N.; Diouf, M.; Diop, M.; Lo, M.M.; Diouf, M.N.; Zecchin, B.; Tassoni, L.; Fusaro, A.; Pastori, A.; Monne, I.; Terregino, C. |
| [EPI1866449](https://platform.epicov.org/epi3/start/EPI/1866449) | Senegal | 2020-Dec-23 | [EPI_ISL_2276068](https://platform.epicov.org/epi3/start/EPI_ISL/2276068) | A/chicken/Senegal/21VIR1084-3/2021 | Istituto Zooprofilattico Sperimentale delle Venezie, EU/OIE/Reference Laboratory and FAO Reference Centre for AI and ND | Istituto Zooprofilattico Sperimentale Delle Venezie | Lo, F.T.; Diallo, A.A.; Ba, R.O.; Diouf, M.; Diop, A.; Samb, Y.N.; Diouf, M.; Diop, M.; Lo, M.M.; Diouf, M.N.; Zecchin, B.; Tassoni, L.; Fusaro, A.; Pastori, A.; Monne, I.; Terregino, C. |
| [EPI2053439](https://platform.epicov.org/epi3/start/EPI/2053439) | Burkina Faso | 2021-Dec-16 | [EPI_ISL_13048383](https://platform.epicov.org/epi3/start/EPI_ISL/13048383) | A/chicken/Burkina_Faso/21VIR11911-5/2021 | Laboratoire National d’Elevage | Istituto Zooprofilattico Sperimentale Delle Venezie | LALIDIA-OUOBA, B.; LAMOUNI-ZERBO-OUERMI, H.; Zecchin, B.; Barbierato, G.; OUANDAOGO-SANDAOGO, H.; GUITTI-KINDO, M.; GUIGMA, D.; Barro, N., Palumbo, E.; Giussani, E.; Bortolami, A.; Terregino, C.; Fusaro, A.; Monne, I. |
| [EPI1866473](https://platform.epicov.org/epi3/start/EPI/1866473) | Senegal | 2021-Jan-23 | [EPI_ISL_2276071](https://platform.epicov.org/epi3/start/EPI_ISL/2276071) | A/great-white_pelican/Senegal/21-67_21VIR1084-8/2021 | Istituto Zooprofilattico Sperimentale delle Venezie, EU/OIE/Reference Laboratory and FAO Reference Centre for AI and ND | Istituto Zooprofilattico Sperimentale Delle Venezie | Lo, F.T.; Diallo, A.A.; Ba, R.O.; Diouf, M.; Diop, A.; Samb, Y.N.; Diouf, M.; Diop, M.; Lo, M.M.; Diouf, M.N.; Zecchin, B.; Tassoni, L.; Fusaro, A.; Pastori, A.; Monne, I.; Terregino, C. |
| [EPI2161537](https://platform.epicov.org/epi3/start/EPI/2161537) | Benin | 2021-Sep-01 | [EPI_ISL_14871339](https://platform.epicov.org/epi3/start/EPI_ISL/14871339) | A/poultry/Benin/21-A-09-031-O/2021 |  | Import from public-domain | Sanogo,I.N.; Djegui,F.; Dupre,G.; Rubrum,A.; Jeevan,T.; McKenzie,P.; Webby,R.J.; Ducatez,M.F. |
| [EPI2161530](https://platform.epicov.org/epi3/start/EPI/2161530) | Benin | 2021-Sep-01 | [EPI_ISL_14871338](https://platform.epicov.org/epi3/start/EPI_ISL/14871338) | A/poultry/Benin/21-A-08-034-O/2021 |  | Import from public-domain | Sanogo,I.N.; Djegui,F.; Dupre,G.; Rubrum,A.; Jeevan,T.; McKenzie,P.; Webby,R.J.; Ducatez,M.F. |
| [EPI2161523](https://platform.epicov.org/epi3/start/EPI/2161523) | Benin | 2021-Sep-01 | [EPI_ISL_14871337](https://platform.epicov.org/epi3/start/EPI_ISL/14871337) | A/poultry/Benin/21-A-08-033-O/2021 |  | Import from public-domain | Sanogo,I.N.; Djegui,F.; Dupre,G.; Rubrum,A.; Jeevan,T.; McKenzie,P.; Webby,R.J.; Ducatez,M.F. |
| [EPI2161516](https://platform.epicov.org/epi3/start/EPI/2161516) | Benin | 2021-Aug-01 | [EPI_ISL_14871336](https://platform.epicov.org/epi3/start/EPI_ISL/14871336) | A/poultry/Benin/21-A-08-009-O/2021 |  | Import from public-domain | Sanogo,I.N.; Djegui,F.; Dupre,G.; Rubrum,A.; Jeevan,T.; McKenzie,P.; Webby,R.J.; Ducatez,M.F. |
| [EPI2161509](https://platform.epicov.org/epi3/start/EPI/2161509) | Benin | 2021-Sep-01 | [EPI_ISL_14871335](https://platform.epicov.org/epi3/start/EPI_ISL/14871335) | A/poultry/Benin/21-A-08-035-O/2021 |  | Import from public-domain | Sanogo,I.N.; Djegui,F.; Dupre,G.; Rubrum,A.; Jeevan,T.; McKenzie,P.; Webby,R.J.; Ducatez,M.F. |
| [EPI2244210](https://platform.epicov.org/epi3/start/EPI/2244210) | Denmark | 2022-Jul-17 | [EPI_ISL_16113090](https://platform.epicov.org/epi3/start/EPI_ISL/16113090) | A/peregrine_falcon/Denmark/06880-1.02/2022 | Statens Serumm Institute | Statens Serum Institute | Hjulsager,Charlotte; Liang,Yuan |
| [EPI1883029](https://platform.epicov.org/epi3/start/EPI/1883029) | Denmark | 2020-Nov-06 | [EPI_ISL_984690](https://platform.epicov.org/epi3/start/EPI_ISL/984690) | A/peregrine falcon/Denmark/14596-1/2020 | Statens Serumm Institute | Statens Serum Institute | Yuan Liang, Charlotte Hjulsager |
| [EPI1813749](https://platform.epicov.org/epi3/start/EPI/1813749) | Denmark | 2020-Oct-30 | [EPI_ISL_644737](https://platform.epicov.org/epi3/start/EPI_ISL/644737) | A/peregrine falcon/Denmark/13776-1/2020-10-30(H5N5) | Statens Serumm Institute | Statens Serum Institute | Charlotte,Hjulsager |
| [EPI1919577](https://platform.epicov.org/epi3/start/EPI/1919577) | Germany | 2020-Oct-26 | [EPI_ISL_5057856](https://platform.epicov.org/epi3/start/EPI_ISL/5057856) | A/peregrine falcon/Germany-SH/AI02162/2020 | Landeslabor Schleswig-Holstein | Friedrich-Loeffler-Institut |  |
| [EPI1847780](https://platform.epicov.org/epi3/start/EPI/1847780) | Denmark | 2021-Jan-01 | [EPI_ISL_1063993](https://platform.epicov.org/epi3/start/EPI_ISL/1063993) | A/common kestrel/Denmark/16023-01/2021-01-01(H5N3) | Statens Serumm Institute | Statens Serum Institute | Charlotte Hjulsager, Jesper Schak Krog |
| [EPI1954371](https://platform.epicov.org/epi3/start/EPI/1954371) | Germany | 2020-Dec-21 | [EPI_ISL_5098135](https://platform.epicov.org/epi3/start/EPI_ISL/5098135) | A/kestrel/Germany-NI/AI03672/2020 | Lebensmittel- und Veterinärinstitut Oldenburg - Standort Veterinärinstitut | Friedrich-Loeffler-Institut |  |
| [EPI1944215](https://platform.epicov.org/epi3/start/EPI/1944215) | Germany | 2021-Jan-18 | [EPI_ISL_5098142](https://platform.epicov.org/epi3/start/EPI_ISL/5098142) | A/Hawaiian goose/Germany-RP/AI00856/2021 | CVUA Karlsruhe | Friedrich-Loeffler-Institut |  |
| [EPI1945195](https://platform.epicov.org/epi3/start/EPI/1945195) | Germany | 2021-Oct-20 | [EPI_ISL_7753309](https://platform.epicov.org/epi3/start/EPI_ISL/7753309) | A/lesser white-fronted goose/Germany-MV/AI05973/2021 | Landesamt für Landwirtschaft, Lebensmittelsicherheit und Fischerei (LALLF) | Friedrich-Loeffler-Institut |  |
| [EPI1943880](https://platform.epicov.org/epi3/start/EPI/1943880) | Germany | 2021-Mar-10 | [EPI_ISL_5143300](https://platform.epicov.org/epi3/start/EPI_ISL/5143300) | A/domestic goose/Germany-MV/AI02558/2021 | Landesamt für Landwirtschaft, Lebensmittelsicherheit und Fischerei (LALLF) | Friedrich-Loeffler-Institut |  |
| [EPI1944168](https://platform.epicov.org/epi3/start/EPI/1944168) | Germany | 2021-Mar-05 | [EPI_ISL_5115969](https://platform.epicov.org/epi3/start/EPI_ISL/5115969) | A/domestic goose/Germany-MV/AI02319/2021 | Landesamt für Landwirtschaft, Lebensmittelsicherheit und Fischerei (LALLF) | Friedrich-Loeffler-Institut |  |
| [EPI1944213](https://platform.epicov.org/epi3/start/EPI/1944213) | Germany | 2021-Feb-01 | [EPI_ISL_5098144](https://platform.epicov.org/epi3/start/EPI_ISL/5098144) | A/pomeranian goose/Germany-MV/AI01100/2021 | Landesamt für Landwirtschaft, Lebensmittelsicherheit und Fischerei (LALLF) | Friedrich-Loeffler-Institut |  |
| [EPI1943860](https://platform.epicov.org/epi3/start/EPI/1943860) | Germany | 2021-Mar-16 | [EPI_ISL_5144725](https://platform.epicov.org/epi3/start/EPI_ISL/5144725) | A/domestic goose/Germany-NI/AI02980/2021 | Lebensmittel- und Veterinärinstitut Oldenburg - Standort Veterinärinstitut | Friedrich-Loeffler-Institut |  |
| [EPI1943863](https://platform.epicov.org/epi3/start/EPI/1943863) | Germany | 2021-Mar-20 | [EPI_ISL_5144529](https://platform.epicov.org/epi3/start/EPI_ISL/5144529) | A/domestic goose/Germany-NI/AI03142/2021 | Lebensmittel- und Veterinärinstitut Oldenburg - Standort Veterinärinstitut | Friedrich-Loeffler-Institut |  |
| [EPI1944154](https://platform.epicov.org/epi3/start/EPI/1944154) | Germany | 2021-Mar-18 | [EPI_ISL_5123578](https://platform.epicov.org/epi3/start/EPI_ISL/5123578) | A/domestic goose/Germany-NI/AI03093/2021 | Lebensmittel- und Veterinärinstitut Oldenburg - Standort Veterinärinstitut | Friedrich-Loeffler-Institut |  |
| [EPI1944209](https://platform.epicov.org/epi3/start/EPI/1944209) | Germany | 2020-Nov-19 | [EPI_ISL_5098153](https://platform.epicov.org/epi3/start/EPI_ISL/5098153) | A/wild goose/Germany-NI/AI03101/2020 | Lebensmittel- und Veterinärinstitut Oldenburg - Standort Veterinärinstitut | Friedrich-Loeffler-Institut |  |
| [EPI1944210](https://platform.epicov.org/epi3/start/EPI/1944210) | Germany | 2020-Dec-14 | [EPI_ISL_5098147](https://platform.epicov.org/epi3/start/EPI_ISL/5098147) | A/wild goose/Germany-NI/AI03471/2020 | Lebensmittel- und Veterinärinstitut Oldenburg - Standort Veterinärinstitut | Friedrich-Loeffler-Institut |  |
| [EPI1944216](https://platform.epicov.org/epi3/start/EPI/1944216) | Germany | 2021-Jan-18 | [EPI_ISL_5098139](https://platform.epicov.org/epi3/start/EPI_ISL/5098139) | A/wild goose/Germany-NI/AI00854/2021 | Lebensmittel- und Veterinärinstitut Oldenburg - Standort Veterinärinstitut | Friedrich-Loeffler-Institut |  |
| [EPI1954370](https://platform.epicov.org/epi3/start/EPI/1954370) | Germany | 2021-Jan-11 | [EPI_ISL_5098138](https://platform.epicov.org/epi3/start/EPI_ISL/5098138) | A/wild goose/Germany-NI/AI00626/2021 | Lebensmittel- und Veterinärinstitut Oldenburg - Standort Veterinärinstitut | Friedrich-Loeffler-Institut |  |
| [EPI1954377](https://platform.epicov.org/epi3/start/EPI/1954377) | Germany | 2021-Jan-12 | [EPI_ISL_5096629](https://platform.epicov.org/epi3/start/EPI_ISL/5096629) | A/wild goose/Germany-NI/AI00625/2021 | Lebensmittel- und Veterinärinstitut Oldenburg - Standort Veterinärinstitut | Friedrich-Loeffler-Institut |  |
| [EPI1954381](https://platform.epicov.org/epi3/start/EPI/1954381) | Germany | 2021-Jan-20 | [EPI_ISL_5096104](https://platform.epicov.org/epi3/start/EPI_ISL/5096104) | A/wild goose/Germany-NI/AI00855/2021 | Lebensmittel- und Veterinärinstitut Oldenburg - Standort Veterinärinstitut | Friedrich-Loeffler-Institut |  |
| [EPI1954393](https://platform.epicov.org/epi3/start/EPI/1954393) | Germany | 2020-Dec-17 | [EPI_ISL_5095336](https://platform.epicov.org/epi3/start/EPI_ISL/5095336) | A/wild goose/Germany-NI/AI03473/2020 | Lebensmittel- und Veterinärinstitut Oldenburg - Standort Veterinärinstitut | Friedrich-Loeffler-Institut |  |
| [EPI1954394](https://platform.epicov.org/epi3/start/EPI/1954394) | Germany | 2020-Dec-10 | [EPI_ISL_5095323](https://platform.epicov.org/epi3/start/EPI_ISL/5095323) | A/wild goose/Germany-NI/AI03220/2020 | Lebensmittel- und Veterinärinstitut Oldenburg - Standort Veterinärinstitut | Friedrich-Loeffler-Institut |  |
| [EPI2244295](https://platform.epicov.org/epi3/start/EPI/2244295) | Germany | 2022-Jul-25 | [EPI_ISL_16122075](https://platform.epicov.org/epi3/start/EPI_ISL/16122075) | A/domestic goose/Germany-SH/AI04267/2022 | Landeslabor Schleswig-Holstein | Friedrich-Loeffler-Institut |  |
| [EPI1945283](https://platform.epicov.org/epi3/start/EPI/1945283) | Germany | 2021-Oct-25 | [EPI_ISL_7753425](https://platform.epicov.org/epi3/start/EPI_ISL/7753425) | A/greylag goose/Germany-SH/AI06205/2021 | Landeslabor Schleswig-Holstein | Friedrich-Loeffler-Institut |  |
| [EPI1945267](https://platform.epicov.org/epi3/start/EPI/1945267) | Germany | 2021-Oct-25 | [EPI_ISL_7753406](https://platform.epicov.org/epi3/start/EPI_ISL/7753406) | A/greylag goose/Germany-SH/AI06144/2021 | Landeslabor Schleswig-Holstein | Friedrich-Loeffler-Institut |  |
| [EPI1945251](https://platform.epicov.org/epi3/start/EPI/1945251) | Germany | 2021-Oct-22 | [EPI_ISL_7753400](https://platform.epicov.org/epi3/start/EPI_ISL/7753400) | A/domestic goose/Germany-SH/AI06024/2021 | Landeslabor Schleswig-Holstein | Friedrich-Loeffler-Institut |  |
| [EPI1945243](https://platform.epicov.org/epi3/start/EPI/1945243) | Germany | 2021-Oct-22 | [EPI_ISL_7753399](https://platform.epicov.org/epi3/start/EPI_ISL/7753399) | A/domestic goose/Germany-SH/AI06150/2021 | Landeslabor Schleswig-Holstein | Friedrich-Loeffler-Institut |  |
| [EPI1945235](https://platform.epicov.org/epi3/start/EPI/1945235) | Germany | 2021-Oct-22 | [EPI_ISL_7753396](https://platform.epicov.org/epi3/start/EPI_ISL/7753396) | A/domestic goose/Germany-SH/AI06147/2021 | Landeslabor Schleswig-Holstein | Friedrich-Loeffler-Institut |  |
| [EPI1945171](https://platform.epicov.org/epi3/start/EPI/1945171) | Germany | 2021-Oct-19 | [EPI_ISL_7753251](https://platform.epicov.org/epi3/start/EPI_ISL/7753251) | A/barnacle goose/Germany-SH/AI06005/2021 | Landeslabor Schleswig-Holstein | Friedrich-Loeffler-Institut |  |
| [EPI1944178](https://platform.epicov.org/epi3/start/EPI/1944178) | Germany | 2021-Mar-04 | [EPI_ISL_5115617](https://platform.epicov.org/epi3/start/EPI_ISL/5115617) | A/domestic goose/Germany-SH/AI02102/2021 | Landeslabor Schleswig-Holstein | Friedrich-Loeffler-Institut |  |
| [EPI1944179](https://platform.epicov.org/epi3/start/EPI/1944179) | Germany | 2021-Mar-04 | [EPI_ISL_5115616](https://platform.epicov.org/epi3/start/EPI_ISL/5115616) | A/domestic goose/Germany-SH/AI02100/2021 | Landeslabor Schleswig-Holstein | Friedrich-Loeffler-Institut |  |
| [EPI1954420](https://platform.epicov.org/epi3/start/EPI/1954420) | Germany | 2020-Nov-18 | [EPI_ISL_5061890](https://platform.epicov.org/epi3/start/EPI_ISL/5061890) | A/domestic goose/Germany-SH/AI02884/2020 | Landeslabor Schleswig-Holstein | Friedrich-Loeffler-Institut |  |
| [EPI1919637](https://platform.epicov.org/epi3/start/EPI/1919637) | Germany | 2020-Nov-02 | [EPI_ISL_5058855](https://platform.epicov.org/epi3/start/EPI_ISL/5058855) | A/wild goose/Germany-SH/AI02194/2020 | Landeslabor Schleswig-Holstein | Friedrich-Loeffler-Institut |  |
| [EPI1860127](https://platform.epicov.org/epi3/start/EPI/1860127) | Romania | 2021-Jan-19 | [EPI_ISL_2234819](https://platform.epicov.org/epi3/start/EPI_ISL/2234819) | A/goose/Romania/10330_21VIR2593-35/2021 | Istituto Zooprofilattico Sperimentale delle Venezie, EU/OIE/Reference Laboratory and FAO Reference Centre for AI and ND | Istituto Zooprofilattico Sperimentale Delle Venezie | Onita, I.; Neicut, A.; Raluca, B.; Razvan, M.; Florica, B.; Zecchin, B.; Fusaro, A.; Giussani, E.; Schivo, A.; Salviato, A.; Monne, I.; Terregino, C. |
| [EPI1860119](https://platform.epicov.org/epi3/start/EPI/1860119) | Romania | 2021-Jan-13 | [EPI_ISL_2234818](https://platform.epicov.org/epi3/start/EPI_ISL/2234818) | A/goose/Romania/10205-t5_21VIR2593-8/2021 | Istituto Zooprofilattico Sperimentale delle Venezie, EU/OIE/Reference Laboratory and FAO Reference Centre for AI and ND | Istituto Zooprofilattico Sperimentale Delle Venezie | Onita, I.; Neicut, A.; Raluca, B.; Razvan, M.; Florica, B.; Zecchin, B.; Fusaro, A.; Giussani, E.; Schivo, A.; Salviato, A.; Monne, I.; Terregino, C. |
| [EPI1860111](https://platform.epicov.org/epi3/start/EPI/1860111) | Romania | 2021-Jan-13 | [EPI_ISL_2234817](https://platform.epicov.org/epi3/start/EPI_ISL/2234817) | A/goose/Romania/10205-t3_21VIR2593-7/2021 | Istituto Zooprofilattico Sperimentale delle Venezie, EU/OIE/Reference Laboratory and FAO Reference Centre for AI and ND | Istituto Zooprofilattico Sperimentale Delle Venezie | Onita, I.; Neicut, A.; Raluca, B.; Razvan, M.; Florica, B.; Zecchin, B.; Fusaro, A.; Giussani, E.; Schivo, A.; Salviato, A.; Monne, I.; Terregino, C. |
| [EPI1858364](https://platform.epicov.org/epi3/start/EPI/1858364) | Romania | 2021-Jan-13 | [EPI_ISL_1665273](https://platform.epicov.org/epi3/start/EPI_ISL/1665273) | A/geese/Romania/10206_21VIR849-3/2021 | Istituto Zooprofilattico Sperimentale delle Venezie, EU/OIE/Reference Laboratory and FAO Reference Centre for AI and ND | Istituto Zooprofilattico Sperimentale Delle Venezie | Onita, I.; Neicut, A.; Raluca, B.; Razvan, M.; Florica, B.; Zecchin, B.; Fusaro, A.; Pastori, A.; Schivo, A.; Salviato, A.; Monne, I.; Terregino, C. |
| [EPI2010531](https://platform.epicov.org/epi3/start/EPI/2010531) | Germany | 2020-Oct-31 | [EPI_ISL_5058630](https://platform.epicov.org/epi3/start/EPI_ISL/5058630) | A/greylag goose/Germany-SH/AI02191/2020 | Landeslabor Schleswig-Holstein | Friedrich-Loeffler-Institut |  |
| [EPI2242317](https://platform.epicov.org/epi3/start/EPI/2242317) | Germany | 2022-Jul-04 | [EPI_ISL_16096047](https://platform.epicov.org/epi3/start/EPI_ISL/16096047) | A/black-headed gull/Germany-NI/AI04164/2022 | Lebensmittel- und Veterinärinstitut Oldenburg - Standort Veterinärinstitut | Friedrich-Loeffler-Institut |  |
| [EPI1944225](https://platform.epicov.org/epi3/start/EPI/1944225) | Germany | 2021-Oct-12 | [EPI_ISL_7733048](https://platform.epicov.org/epi3/start/EPI_ISL/7733048) | A/black-headed gull/Germany-NI/AI05962/2021 | Lebensmittel- und Veterinärinstitut Oldenburg - Standort Veterinärinstitut | Friedrich-Loeffler-Institut |  |
| [EPI1945211](https://platform.epicov.org/epi3/start/EPI/1945211) | Germany | 2021-Oct-21 | [EPI_ISL_7753347](https://platform.epicov.org/epi3/start/EPI_ISL/7753347) | A/herring gull/Germany-SH/AI06141/2021 | Landeslabor Schleswig-Holstein | Friedrich-Loeffler-Institut |  |
| [EPI1944201](https://platform.epicov.org/epi3/start/EPI/1944201) | Germany | 2021-Feb-17 | [EPI_ISL_5099372](https://platform.epicov.org/epi3/start/EPI_ISL/5099372) | A/Laridae/Germany-SH/AI01498/2021 | Landeslabor Schleswig-Holstein | Friedrich-Loeffler-Institut |  |
| [EPI2242299](https://platform.epicov.org/epi3/start/EPI/2242299) | Germany | 2022-Feb-07 | [EPI_ISL_16096042](https://platform.epicov.org/epi3/start/EPI_ISL/16096042) | A/black-headed gull/Germany-BY/AI01062/2022 | Bayrisches Landesamt für Gesundheit und Lebensmittelsicherheit (LGL) | Friedrich-Loeffler-Institut |  |
| [EPI2242308](https://platform.epicov.org/epi3/start/EPI/2242308) | Germany | 2022-Jul-02 | [EPI_ISL_16096044](https://platform.epicov.org/epi3/start/EPI_ISL/16096044) | A/black-headed gull/Germany-HH/AI03795/2022 | Institut für Hygiene und Umwelt | Friedrich-Loeffler-Institut |  |
| [EPI2015061](https://platform.epicov.org/epi3/start/EPI/2015061) | Denmark | 2021-May-14 | [EPI_ISL_11798575](https://platform.epicov.org/epi3/start/EPI_ISL/11798575) | A/European_herring_gull/Denmark/19968-1.02/2021-05-14 | Statens Serumm Institute | Statens Serum Institute | Charlotte Hjulsager, Yuan Liang |
| [EPI1954416](https://platform.epicov.org/epi3/start/EPI/1954416) | Germany | 2020-Nov-02 | [EPI_ISL_5062851](https://platform.epicov.org/epi3/start/EPI_ISL/5062851) | A/herring gull/Germany-MV/AI02300/2020 | Landesamt für Landwirtschaft, Lebensmittelsicherheit und Fischerei (LALLF) | Friedrich-Loeffler-Institut |  |
| [EPI1919614](https://platform.epicov.org/epi3/start/EPI/1919614) | Germany | 2020-Nov-02 | [EPI_ISL_5058090](https://platform.epicov.org/epi3/start/EPI_ISL/5058090) | A/herring gull/Germany-HH/AI02182/2020 | Institut für Hygiene und Umwelt | Friedrich-Loeffler-Institut |  |
| [EPI2131848](https://platform.epicov.org/epi3/start/EPI/2131848) | Germany | 2022-Jun-14 | [EPI_ISL_14571438](https://platform.epicov.org/epi3/start/EPI_ISL/14571438) | A/common tern/Germany-NI/AI03523/2022 | Lebensmittel- und Veterinärinstitut Oldenburg - Standort Veterinärinstitut | Friedrich-Loeffler-Institut |  |
| [EPI2131833](https://platform.epicov.org/epi3/start/EPI/2131833) | Germany | 2022-Jun-14 | [EPI_ISL_14571436](https://platform.epicov.org/epi3/start/EPI_ISL/14571436) | A/common tern/Germany-NI/AI03520/2022 | Lebensmittel- und Veterinärinstitut Oldenburg - Standort Veterinärinstitut | Friedrich-Loeffler-Institut |  |
| [EPI2131824](https://platform.epicov.org/epi3/start/EPI/2131824) | Germany | 2022-Jun-16 | [EPI_ISL_14571434](https://platform.epicov.org/epi3/start/EPI_ISL/14571434) | A/common tern/Germany-NI/AI03512/2022 | Lebensmittel- und Veterinärinstitut Oldenburg - Standort Veterinärinstitut | Friedrich-Loeffler-Institut |  |
| [EPI2131809](https://platform.epicov.org/epi3/start/EPI/2131809) | Germany | 2022-Jun-07 | [EPI_ISL_14571432](https://platform.epicov.org/epi3/start/EPI_ISL/14571432) | A/common tern/Germany-NI/AI03186/2022 | Lebensmittel- und Veterinärinstitut Oldenburg - Standort Veterinärinstitut | Friedrich-Loeffler-Institut |  |
| [EPI2131800](https://platform.epicov.org/epi3/start/EPI/2131800) | Germany | 2022-Jun-07 | [EPI_ISL_14571430](https://platform.epicov.org/epi3/start/EPI_ISL/14571430) | A/common tern/Germany-NI/AI03185/2022 | Lebensmittel- und Veterinärinstitut Oldenburg - Standort Veterinärinstitut | Friedrich-Loeffler-Institut |  |
| [EPI2244091](https://platform.epicov.org/epi3/start/EPI/2244091) | Denmark | 2022-Jun-19 | [EPI_ISL_16112044](https://platform.epicov.org/epi3/start/EPI_ISL/16112044) | A/Arctic_tern/Denmark/05803-1.01/2022 | Statens Serumm Institute | Statens Serum Institute | Hjulsager,Charlotte; Liang,Yuan |
| [EPI2244186](https://platform.epicov.org/epi3/start/EPI/2244186) | Denmark | 2022-Jun-19 | [EPI_ISL_16113230](https://platform.epicov.org/epi3/start/EPI_ISL/16113230) | A/sandwich_tern/Denmark/05806-1.01/2022 | Statens Serumm Institute | Statens Serum Institute | Hjulsager,Charlotte; Liang,Yuan |
| [EPI2244194](https://platform.epicov.org/epi3/start/EPI/2244194) | Denmark | 2022-Jun-17 | [EPI_ISL_16113229](https://platform.epicov.org/epi3/start/EPI_ISL/16113229) | A/sandwich_tern/Denmark/05802-1.01_2022 | Statens Serum Institute | Statens Serum Institute | Hjulsager,Charlotte; Liang,Yuan |
| [EPI2244202](https://platform.epicov.org/epi3/start/EPI/2244202) | Denmark | 2022-Jun-14 | [EPI_ISL_16113225](https://platform.epicov.org/epi3/start/EPI_ISL/16113225) | A/sandwich_tern/Denmark/05712-1.02/2022 | Statens Serum Institute | Statens Serum Institute | Hjulsager, Charlotte; Liang,Yuan |
| [EPI2015041](https://platform.epicov.org/epi3/start/EPI/2015041) | Romania | 2022-Mar-07 | [EPI_ISL_11922822](https://platform.epicov.org/epi3/start/EPI_ISL/11922822) | A/swan/Romania/10986_22VIR2749-8/2022 | Institute for Diagnosis & Animal Health (IDAH) | Istituto Zooprofilattico Sperimentale delle Venezie | Barbuceanu, F.; Onita, I.; Neicut, A.; Motiu, R.; Burlacu, R.; Barbierato, G.; Zecchin, B.; Fusaro, A.; Schivo, A.; Salviato, A.; Palumbo, E.; Giussani, E.; Monne, I.; Terregino, C. |
| [EPI2015033](https://platform.epicov.org/epi3/start/EPI/2015033) | Romania | 2022-Feb-23 | [EPI_ISL_11922821](https://platform.epicov.org/epi3/start/EPI_ISL/11922821) | A/swan/Romania/10678_22VIR2749-7/2022 | Institute for Diagnosis & Animal Health (IDAH) | Istituto Zooprofilattico Sperimentale delle Venezie | Barbuceanu, F.; Onita, I.; Neicut, A.; Motiu, R.; Burlacu, R.; Barbierato, G.; Zecchin, B.; Fusaro, A.; Schivo, A.; Salviato, A.; Palumbo, E.; Giussani, E.; Monne, I.; Terregino, C. |
| [EPI2015025](https://platform.epicov.org/epi3/start/EPI/2015025) | Romania | 2022-Feb-22 | [EPI_ISL_11922820](https://platform.epicov.org/epi3/start/EPI_ISL/11922820) | A/swan/Romania/10656_22VIR2749-6/2022 | Institute for Diagnosis & Animal Health (IDAH) | Istituto Zooprofilattico Sperimentale delle Venezie | Barbuceanu, F.; Onita, I.; Neicut, A.; Motiu, R.; Burlacu, R.; Barbierato, G.; Zecchin, B.; Fusaro, A.; Schivo, A.; Salviato, A.; Palumbo, E.; Giussani, E.; Monne, I.; Terregino, C. |
| [EPI2015009](https://platform.epicov.org/epi3/start/EPI/2015009) | Romania | 2022-Feb-09 | [EPI_ISL_11922818](https://platform.epicov.org/epi3/start/EPI_ISL/11922818) | A/swan/Romania/10455_22VIR2749-4/2022 | Institute for Diagnosis & Animal Health (IDAH) | Istituto Zooprofilattico Sperimentale delle Venezie | Barbuceanu, F.; Onita, I.; Neicut, A.; Motiu, R.; Burlacu, R.; Barbierato, G.; Zecchin, B.; Fusaro, A.; Schivo, A.; Salviato, A.; Palumbo, E.; Giussani, E.; Monne, I.; Terregino, C. |
| [EPI2015001](https://platform.epicov.org/epi3/start/EPI/2015001) | Romania | 2022-Feb-03 | [EPI_ISL_11922817](https://platform.epicov.org/epi3/start/EPI_ISL/11922817) | A/swan/Romania/10394_22VIR2749-3/2022 | Institute for Diagnosis & Animal Health (IDAH) | Istituto Zooprofilattico Sperimentale delle Venezie | Barbuceanu, F.; Onita, I.; Neicut, A.; Motiu, R.; Burlacu, R.; Barbierato, G.; Zecchin, B.; Fusaro, A.; Schivo, A.; Salviato, A.; Palumbo, E.; Giussani, E.; Monne, I.; Terregino, C. |
| [EPI2014993](https://platform.epicov.org/epi3/start/EPI/2014993) | Romania | 2022-Feb-01 | [EPI_ISL_11922816](https://platform.epicov.org/epi3/start/EPI_ISL/11922816) | A/swan/Romania/10324_22VIR2749-2/2022 | Institute for Diagnosis & Animal Health (IDAH) | Istituto Zooprofilattico Sperimentale delle Venezie | Barbuceanu, F.; Onita, I.; Neicut, A.; Motiu, R.; Burlacu, R.; Barbierato, G.; Zecchin, B.; Fusaro, A.; Schivo, A.; Salviato, A.; Palumbo, E.; Giussani, E.; Monne, I.; Terregino, C. |
| [EPI2014985](https://platform.epicov.org/epi3/start/EPI/2014985) | Romania | 2021-Dec-08 | [EPI_ISL_11922815](https://platform.epicov.org/epi3/start/EPI_ISL/11922815) | A/swan/Romania/16905_22VIR2749-1/2021 | Institute for Diagnosis & Animal Health (IDAH) | Istituto Zooprofilattico Sperimentale delle Venezie | Barbuceanu, F.; Onita, I.; Neicut, A.; Motiu, R.; Burlacu, R.; Barbierato, G.; Zecchin, B.; Fusaro, A.; Schivo, A.; Salviato, A.; Palumbo, E.; Giussani, E.; Monne, I.; Terregino, C. |
| [EPI1987824](https://platform.epicov.org/epi3/start/EPI/1987824) | Germany | 2022-Jan-30 | [EPI_ISL_10434073](https://platform.epicov.org/epi3/start/EPI_ISL/10434073) | A/swan/Germany-BW/AI00997/2022 | CVUA Karlsruhe | Friedrich-Loeffler-Institut |  |
| [EPI1987816](https://platform.epicov.org/epi3/start/EPI/1987816) | Germany | 2022-Jan-29 | [EPI_ISL_10434072](https://platform.epicov.org/epi3/start/EPI_ISL/10434072) | A/swan/Germany-BW/AI00996/2022 | CVUA Karlsruhe | Friedrich-Loeffler-Institut |  |
| [EPI1943853](https://platform.epicov.org/epi3/start/EPI/1943853) | Germany | 2021-Jul-20 | [EPI_ISL_5145796](https://platform.epicov.org/epi3/start/EPI_ISL/5145796) | A/swan/Germany-NI/AI05045/2021 | Lebensmittel- und Veterinärinstitut Oldenburg - Standort Veterinärinstitut | Friedrich-Loeffler-Institut |  |
| [EPI1944165](https://platform.epicov.org/epi3/start/EPI/1944165) | Germany | 2021-Feb-26 | [EPI_ISL_5116063](https://platform.epicov.org/epi3/start/EPI_ISL/5116063) | A/swan/Germany-HE/AI02335/2021 | Landesbetrieb Hessisches Landeslabor | Friedrich-Loeffler-Institut |  |
| [EPI1944166](https://platform.epicov.org/epi3/start/EPI/1944166) | Germany | 2021-Feb-26 | [EPI_ISL_5116063](https://platform.epicov.org/epi3/start/EPI_ISL/5116063) | A/swan/Germany-HE/AI02335/2021 | Landesbetrieb Hessisches Landeslabor | Friedrich-Loeffler-Institut |  |
| [EPI1860167](https://platform.epicov.org/epi3/start/EPI/1860167) | Romania | 2021-Jan-22 | [EPI_ISL_2234824](https://platform.epicov.org/epi3/start/EPI_ISL/2234824) | A/whooper_swan/Romania/10362_21VIR2593-20/2021 | Istituto Zooprofilattico Sperimentale delle Venezie, EU/OIE/Reference Laboratory and FAO Reference Centre for AI and ND | Istituto Zooprofilattico Sperimentale Delle Venezie | Onita, I.; Neicut, A.; Raluca, B.; Razvan, M.; Florica, B.; Zecchin, B.; Fusaro, A.; Giussani, E.; Schivo, A.; Salviato, A.; Monne, I.; Terregino, C. |
| [EPI1860159](https://platform.epicov.org/epi3/start/EPI/1860159) | Romania | 2021-Jan-14 | [EPI_ISL_2234823](https://platform.epicov.org/epi3/start/EPI_ISL/2234823) | A/whooper_swan/Romania/10213_21VIR2593-27/2021 | Istituto Zooprofilattico Sperimentale delle Venezie, EU/OIE/Reference Laboratory and FAO Reference Centre for AI and ND | Istituto Zooprofilattico Sperimentale Delle Venezie | Onita, I.; Neicut, A.; Raluca, B.; Razvan, M.; Florica, B.; Zecchin, B.; Fusaro, A.; Giussani, E.; Schivo, A.; Salviato, A.; Monne, I.; Terregino, C. |
| [EPI1860151](https://platform.epicov.org/epi3/start/EPI/1860151) | Romania | 2021-Jan-12 | [EPI_ISL_2234822](https://platform.epicov.org/epi3/start/EPI_ISL/2234822) | A/whooper_swan/Romania/10171_21VIR2593-15/2021 | Istituto Zooprofilattico Sperimentale delle Venezie, EU/OIE/Reference Laboratory and FAO Reference Centre for AI and ND | Istituto Zooprofilattico Sperimentale Delle Venezie | Onita, I.; Neicut, A.; Raluca, B.; Razvan, M.; Florica, B.; Zecchin, B.; Fusaro, A.; Giussani, E.; Schivo, A.; Salviato, A.; Monne, I.; Terregino, C. |
| [EPI1860143](https://platform.epicov.org/epi3/start/EPI/1860143) | Romania | 2021-Jan-08 | [EPI_ISL_2234821](https://platform.epicov.org/epi3/start/EPI_ISL/2234821) | A/whooper_swan/Romania/10122_21VIR2593-23/2021 | Istituto Zooprofilattico Sperimentale delle Venezie, EU/OIE/Reference Laboratory and FAO Reference Centre for AI and ND | Istituto Zooprofilattico Sperimentale Delle Venezie | Onita, I.; Neicut, A.; Raluca, B.; Razvan, M.; Florica, B.; Zecchin, B.; Fusaro, A.; Giussani, E.; Schivo, A.; Salviato, A.; Monne, I.; Terregino, C. |
| [EPI1858348](https://platform.epicov.org/epi3/start/EPI/1858348) | Romania | 2021-Jan-20 | [EPI_ISL_1665269](https://platform.epicov.org/epi3/start/EPI_ISL/1665269) | A/whooper_swan/Romania/10311_21VIR849-2/2021 | Istituto Zooprofilattico Sperimentale delle Venezie, EU/OIE/Reference Laboratory and FAO Reference Centre for AI and ND | Istituto Zooprofilattico Sperimentale Delle Venezie | Onita, I.; Neicut, A.; Raluca, B.; Razvan, M.; Florica, B.; Zecchin, B.; Fusaro, A.; Pastori, A.; Schivo, A.; Salviato, A.; Monne, I.; Terregino, C. |
| [EPI1858340](https://platform.epicov.org/epi3/start/EPI/1858340) | Romania | 2021-Jan-08 | [EPI_ISL_1665268](https://platform.epicov.org/epi3/start/EPI_ISL/1665268) | A/whooper_swan/Romania/10123_21VIR849-1/2021 | Istituto Zooprofilattico Sperimentale delle Venezie, EU/OIE/Reference Laboratory and FAO Reference Centre for AI and ND | Istituto Zooprofilattico Sperimentale Delle Venezie | Onita, I.; Neicut, A.; Raluca, B.; Razvan, M.; Florica, B.; Zecchin, B.; Fusaro, A.; Pastori, A.; Schivo, A.; Salviato, A.; Monne, I.; Terregino, C. |
| [EPI1858292](https://platform.epicov.org/epi3/start/EPI/1858292) | Slovakia | 2021-Jan-15 | [EPI_ISL_1665262](https://platform.epicov.org/epi3/start/EPI_ISL/1665262) | A/mute_swan/Slovakia/Pah6_21VIR1086-2/2021 | Istituto Zooprofilattico Sperimentale delle Venezie, EU/OIE/Reference Laboratory and FAO Reference Centre for AI and ND | Istituto Zooprofilattico Sperimentale Delle Venezie | Dirb?kov?, Z.; Tin?k, M.; Zecchin, B.; Fusaro, A.; Pastori, A.; Schivo, A.; Salviato, A.; Monne, I.; Terregino, C. |
| [EPI1858284](https://platform.epicov.org/epi3/start/EPI/1858284) | Slovakia | 2021-Jan-29 | [EPI_ISL_1665261](https://platform.epicov.org/epi3/start/EPI_ISL/1665261) | A/mute_swan/Slovakia/Pah15_21VIR1086-3/2021 | Istituto Zooprofilattico Sperimentale delle Venezie, EU/OIE/Reference Laboratory and FAO Reference Centre for AI and ND | Istituto Zooprofilattico Sperimentale Delle Venezie | Dirb?kov?, Z.; Tin?k, M.; Zecchin, B.; Fusaro, A.; Pastori, A.; Schivo, A.; Salviato, A.; Monne, I.; Terregino, C. |
| [EPI1883992](https://platform.epicov.org/epi3/start/EPI/1883992) | Hungary | 2021-Mar-08 | [EPI_ISL_3135931](https://platform.epicov.org/epi3/start/EPI_ISL/3135931) | A/swan/Hungary/9638/2021 (H5N8) | National Food Chain Safety Office Veterinary Diagnostic Directorate Laboratory for Molecular Biology | National Food Chain Safety Office, Hungary | Katalin,Szentpáli-Gavallér;Ádám,Bálint;Krisztina,Ursu;Péter,Malik |
| [EPI1944161](https://platform.epicov.org/epi3/start/EPI/1944161) | Germany | 2021-Mar-02 | [EPI_ISL_5116172](https://platform.epicov.org/epi3/start/EPI_ISL/5116172) | A/mute swan/Germany-HE/AI02373/2021 | Landesbetrieb Hessisches Landeslabor | Friedrich-Loeffler-Institut |  |
| [EPI1950887](https://platform.epicov.org/epi3/start/EPI/1950887) | Romania | 2021-Nov-26 | [EPI_ISL_8440976](https://platform.epicov.org/epi3/start/EPI_ISL/8440976) | A/mute_swan/Romania/16790_21VIR11355/2021 | Institute for Diagnosis & Animal Health (IDAH) | Istituto Zooprofilattico Sperimentale Delle Venezie | Burlacu, R.; Neicut, A.; Onita, I.; Motiu, R.; Zecchin, B.; Fusaro, A.; Schivo, A.; Salviato, A.; Palumbo, E.; Milani, A.; Giussani, E.; Pastori, A.; Monne, I.; Terregino, C. |
| [EPI1950879](https://platform.epicov.org/epi3/start/EPI/1950879) | Romania | 2021-Nov-11 | [EPI_ISL_8440175](https://platform.epicov.org/epi3/start/EPI_ISL/8440175) | A/Cygnus_olor/Romania/16381_21VIR10306/2021 | Institute for Diagnosis & Animal Health (IDAH) | Istituto Zooprofilattico Sperimentale Delle Venezie | Burlacu, R.; Neicut, A.; Onita, I.; Motiu, R.; Zecchin, B.; Fusaro, A.; Schivo, A.; Salviato, A.; Palumbo, E.; Milani, A.; Giussani, E.; Pastori, A.; Monne, I.; Terregino, C. |
| [EPI2012867](https://platform.epicov.org/epi3/start/EPI/2012867) | Denmark | 2021-Oct-30 | [EPI_ISL_11798580](https://platform.epicov.org/epi3/start/EPI_ISL/11798580) | A/turkey/Denmark/24325-25/2021-10-30 | Statens Serumm Institute | Statens Serum Institute | Charlotte Hjulsager, Yuan Liang |
| [EPI1944173](https://platform.epicov.org/epi3/start/EPI/1944173) | Germany | 2021-Mar-02 | [EPI_ISL_5115763](https://platform.epicov.org/epi3/start/EPI_ISL/5115763) | A/turkey/Germany-NW/AI02290/2021 | Chemisches und Veterinäruntersuchungsamt Westfalen-Arnsberg (CVUA-Westfalen) | Friedrich-Loeffler-Institut |  |
| [EPI1943879](https://platform.epicov.org/epi3/start/EPI/1943879) | Germany | 2021-Mar-10 | [EPI_ISL_5143417](https://platform.epicov.org/epi3/start/EPI_ISL/5143417) | A/turkey/Germany-BB/AI02434/2021 | Landeslabor Berlin-Brandenburg | Friedrich-Loeffler-Institut |  |
| [EPI1944169](https://platform.epicov.org/epi3/start/EPI/1944169) | Germany | 2021-Mar-04 | [EPI_ISL_5115968](https://platform.epicov.org/epi3/start/EPI_ISL/5115968) | A/turkey/Germany-BB/AI02318/2021 | Landeslabor Berlin-Brandenburg | Friedrich-Loeffler-Institut |  |
| [EPI1944177](https://platform.epicov.org/epi3/start/EPI/1944177) | Germany | 2021-Mar-04 | [EPI_ISL_5115618](https://platform.epicov.org/epi3/start/EPI_ISL/5115618) | A/turkey/Germany-BB/AI02117/2021 | Landeslabor Berlin-Brandenburg | Friedrich-Loeffler-Institut |  |
| [EPI1944180](https://platform.epicov.org/epi3/start/EPI/1944180) | Germany | 2021-Feb-28 | [EPI_ISL_5115615](https://platform.epicov.org/epi3/start/EPI_ISL/5115615) | A/turkey/Germany-BB/AI01980/2021 | Landeslabor Berlin-Brandenburg | Friedrich-Loeffler-Institut |  |
| [EPI1944207](https://platform.epicov.org/epi3/start/EPI/1944207) | Germany | 2021-Feb-15 | [EPI_ISL_5098158](https://platform.epicov.org/epi3/start/EPI_ISL/5098158) | A/turkey/Germany-BB/AI01419/2021 | Landeslabor Berlin-Brandenburg | Friedrich-Loeffler-Institut |  |
| [EPI1944212](https://platform.epicov.org/epi3/start/EPI/1944212) | Germany | 2021-Feb-04 | [EPI_ISL_5098145](https://platform.epicov.org/epi3/start/EPI_ISL/5098145) | A/turkey/Germany-BB/AI01120/2021 | Landeslabor Berlin-Brandenburg | Friedrich-Loeffler-Institut |  |
| [EPI1954383](https://platform.epicov.org/epi3/start/EPI/1954383) | Germany | 2021-Jan-30 | [EPI_ISL_5095650](https://platform.epicov.org/epi3/start/EPI_ISL/5095650) | A/turkey/Germany-BB/AI01023/2021 | Landeslabor Berlin-Brandenburg | Friedrich-Loeffler-Institut |  |
| [EPI1954387](https://platform.epicov.org/epi3/start/EPI/1954387) | Germany | 2021-Jan-22 | [EPI_ISL_5095644](https://platform.epicov.org/epi3/start/EPI_ISL/5095644) | A/turkey/Germany-BB/AI00868/2021 | Landeslabor Berlin-Brandenburg | Friedrich-Loeffler-Institut |  |
| [EPI1945187](https://platform.epicov.org/epi3/start/EPI/1945187) | Germany | 2021-Oct-20 | [EPI_ISL_7753290](https://platform.epicov.org/epi3/start/EPI_ISL/7753290) | A/turkey/Germany-MV/AI06035/2021 | Landesamt für Landwirtschaft, Lebensmittelsicherheit und Fischerei (LALLF) | Friedrich-Loeffler-Institut |  |
| [EPI1943874](https://platform.epicov.org/epi3/start/EPI/1943874) | Germany | 2021-Mar-26 | [EPI_ISL_5143585](https://platform.epicov.org/epi3/start/EPI_ISL/5143585) | A/turkey/Germany-MV/AI03535/2021 | Landesamt für Landwirtschaft, Lebensmittelsicherheit und Fischerei (LALLF) | Friedrich-Loeffler-Institut |  |
| [EPI1943882](https://platform.epicov.org/epi3/start/EPI/1943882) | Germany | 2021-Mar-10 | [EPI_ISL_5142961](https://platform.epicov.org/epi3/start/EPI_ISL/5142961) | A/turkey/Germany-MV/AI02458/2021 | Landesamt für Landwirtschaft, Lebensmittelsicherheit und Fischerei (LALLF) | Friedrich-Loeffler-Institut |  |
| [EPI1944208](https://platform.epicov.org/epi3/start/EPI/1944208) | Germany | 2021-Feb-06 | [EPI_ISL_5098154](https://platform.epicov.org/epi3/start/EPI_ISL/5098154) | A/turkey/Germany-MV/AI01127/2021 | Landesamt für Landwirtschaft, Lebensmittelsicherheit und Fischerei (LALLF) | Friedrich-Loeffler-Institut |  |
| [EPI1954384](https://platform.epicov.org/epi3/start/EPI/1954384) | Germany | 2021-Jan-28 | [EPI_ISL_5095649](https://platform.epicov.org/epi3/start/EPI_ISL/5095649) | A/turkey/Germany-MV/AI01015/2021 | Landesamt für Landwirtschaft, Lebensmittelsicherheit und Fischerei (LALLF) | Friedrich-Loeffler-Institut |  |
| [EPI1954385](https://platform.epicov.org/epi3/start/EPI/1954385) | Germany | 2021-Jan-26 | [EPI_ISL_5095645](https://platform.epicov.org/epi3/start/EPI_ISL/5095645) | A/turkey/Germany-MV/AI00909/2021 | Landesamt für Landwirtschaft, Lebensmittelsicherheit und Fischerei (LALLF) | Friedrich-Loeffler-Institut |  |
| [EPI1943844](https://platform.epicov.org/epi3/start/EPI/1943844) | Germany | 2021-May-03 | [EPI_ISL_5146481](https://platform.epicov.org/epi3/start/EPI_ISL/5146481) | A/turkey/Germany-NI/AI04425/2021 | Lebensmittel- und Veterinärinstitut Oldenburg - Standort Veterinärinstitut | Friedrich-Loeffler-Institut |  |
| [EPI1943845](https://platform.epicov.org/epi3/start/EPI/1943845) | Germany | 2021-Apr-27 | [EPI_ISL_5146292](https://platform.epicov.org/epi3/start/EPI_ISL/5146292) | A/turkey/Germany-NI/AI04373/2021 | Lebensmittel- und Veterinärinstitut Oldenburg - Standort Veterinärinstitut | Friedrich-Loeffler-Institut |  |
| [EPI1943857](https://platform.epicov.org/epi3/start/EPI/1943857) | Germany | 2021-May-05 | [EPI_ISL_5145223](https://platform.epicov.org/epi3/start/EPI_ISL/5145223) | A/turkey/Germany-NI/AI04455/2021 | Lebensmittel- und Veterinärinstitut Oldenburg - Standort Veterinärinstitut | Friedrich-Loeffler-Institut |  |
| [EPI1943858](https://platform.epicov.org/epi3/start/EPI/1943858) | Germany | 2021-Feb-20 | [EPI_ISL_5144920](https://platform.epicov.org/epi3/start/EPI_ISL/5144920) | A/turkey/Germany-NI/AI01483/2021 | Lebensmittel- und Veterinärinstitut Oldenburg - Standort Veterinärinstitut | Friedrich-Loeffler-Institut |  |
| [EPI1943859](https://platform.epicov.org/epi3/start/EPI/1943859) | Germany | 2021-Feb-21 | [EPI_ISL_5144778](https://platform.epicov.org/epi3/start/EPI_ISL/5144778) | A/turkey/Germany-NI/AI01488/2021 | Lebensmittel- und Veterinärinstitut Oldenburg - Standort Veterinärinstitut | Friedrich-Loeffler-Institut |  |
| [EPI1943861](https://platform.epicov.org/epi3/start/EPI/1943861) | Germany | 2021-Mar-08 | [EPI_ISL_5144632](https://platform.epicov.org/epi3/start/EPI_ISL/5144632) | A/turkey/Germany-NI/AI02393/2021 | Lebensmittel- und Veterinärinstitut Oldenburg - Standort Veterinärinstitut | Friedrich-Loeffler-Institut |  |
| [EPI1943867](https://platform.epicov.org/epi3/start/EPI/1943867) | Germany | 2021-Mar-21 | [EPI_ISL_5144149](https://platform.epicov.org/epi3/start/EPI_ISL/5144149) | A/turkey/Germany-NI/AI03160/2021 | Lebensmittel- und Veterinärinstitut Oldenburg - Standort Veterinärinstitut | Friedrich-Loeffler-Institut |  |
| [EPI1943870](https://platform.epicov.org/epi3/start/EPI/1943870) | Germany | 2021-Mar-23 | [EPI_ISL_5143627](https://platform.epicov.org/epi3/start/EPI_ISL/5143627) | A/turkey/Germany-NI/AI03209/2021 | Lebensmittel- und Veterinärinstitut Oldenburg - Standort Veterinärinstitut | Friedrich-Loeffler-Institut |  |
| [EPI1943881](https://platform.epicov.org/epi3/start/EPI/1943881) | Germany | 2021-Mar-10 | [EPI_ISL_5143100](https://platform.epicov.org/epi3/start/EPI_ISL/5143100) | A/turkey/Germany-NI/AI02424/2021 | Lebensmittel- und Veterinärinstitut Oldenburg - Standort Veterinärinstitut | Friedrich-Loeffler-Institut |  |
| [EPI1943884](https://platform.epicov.org/epi3/start/EPI/1943884) | Germany | 2021-Mar-10 | [EPI_ISL_5142489](https://platform.epicov.org/epi3/start/EPI_ISL/5142489) | A/turkey/Germany-NI/AI02553/2021 | Lebensmittel- und Veterinärinstitut Oldenburg - Standort Veterinärinstitut | Friedrich-Loeffler-Institut |  |
| [EPI1943887](https://platform.epicov.org/epi3/start/EPI/1943887) | Germany | 2021-Mar-18 | [EPI_ISL_5142455](https://platform.epicov.org/epi3/start/EPI_ISL/5142455) | A/turkey/Germany-NI/AI02991/2021 | Lebensmittel- und Veterinärinstitut Oldenburg - Standort Veterinärinstitut | Friedrich-Loeffler-Institut |  |
| [EPI1943891](https://platform.epicov.org/epi3/start/EPI/1943891) | Germany | 2021-Mar-14 | [EPI_ISL_5139441](https://platform.epicov.org/epi3/start/EPI_ISL/5139441) | A/turkey/Germany-NI/AI02663/2021 | Lebensmittel- und Veterinärinstitut Oldenburg - Standort Veterinärinstitut | Friedrich-Loeffler-Institut |  |
| [EPI1943892](https://platform.epicov.org/epi3/start/EPI/1943892) | Germany | 2021-Mar-14 | [EPI_ISL_5137952](https://platform.epicov.org/epi3/start/EPI_ISL/5137952) | A/turkey/Germany-NI/AI02674/2021 | Lebensmittel- und Veterinärinstitut Oldenburg - Standort Veterinärinstitut | Friedrich-Loeffler-Institut |  |
| [EPI1943893](https://platform.epicov.org/epi3/start/EPI/1943893) | Germany | 2021-Mar-13 | [EPI_ISL_5137351](https://platform.epicov.org/epi3/start/EPI_ISL/5137351) | A/turkey/Germany-NI/AI02678/2021 | Lebensmittel- und Veterinärinstitut Oldenburg - Standort Veterinärinstitut | Friedrich-Loeffler-Institut |  |
| [EPI1943929](https://platform.epicov.org/epi3/start/EPI/1943929) | Germany | 2021-Mar-14 | [EPI_ISL_5136837](https://platform.epicov.org/epi3/start/EPI_ISL/5136837) | A/turkey/Germany-NI/AI02671/2021 | Lebensmittel- und Veterinärinstitut Oldenburg - Standort Veterinärinstitut | Friedrich-Loeffler-Institut |  |
| [EPI1943969](https://platform.epicov.org/epi3/start/EPI/1943969) | Germany | 2021-Mar-15 | [EPI_ISL_5136192](https://platform.epicov.org/epi3/start/EPI_ISL/5136192) | A/turkey/Germany-NI/AI02933/2021 | Lebensmittel- und Veterinärinstitut Oldenburg - Standort Veterinärinstitut | Friedrich-Loeffler-Institut |  |
| [EPI1944065](https://platform.epicov.org/epi3/start/EPI/1944065) | Germany | 2021-Mar-15 | [EPI_ISL_5134658](https://platform.epicov.org/epi3/start/EPI_ISL/5134658) | A/turkey/Germany-NI/AI02943/2021 | Lebensmittel- und Veterinärinstitut Oldenburg - Standort Veterinärinstitut | Friedrich-Loeffler-Institut |  |
| [EPI1944111](https://platform.epicov.org/epi3/start/EPI/1944111) | Germany | 2021-Mar-14 | [EPI_ISL_5134186](https://platform.epicov.org/epi3/start/EPI_ISL/5134186) | A/turkey/Germany-NI/AI02950/2021 | Lebensmittel- und Veterinärinstitut Oldenburg - Standort Veterinärinstitut | Friedrich-Loeffler-Institut |  |
| [EPI1944151](https://platform.epicov.org/epi3/start/EPI/1944151) | Germany | 2021-Mar-12 | [EPI_ISL_5123589](https://platform.epicov.org/epi3/start/EPI_ISL/5123589) | A/turkey/Germany-NI/AI02615/2021 | Lebensmittel- und Veterinärinstitut Oldenburg - Standort Veterinärinstitut | Friedrich-Loeffler-Institut |  |
| [EPI1944152](https://platform.epicov.org/epi3/start/EPI/1944152) | Germany | 2021-Mar-19 | [EPI_ISL_5123584](https://platform.epicov.org/epi3/start/EPI_ISL/5123584) | A/turkey/Germany-NI/AI03126/2021 | Lebensmittel- und Veterinärinstitut Oldenburg - Standort Veterinärinstitut | Friedrich-Loeffler-Institut |  |
| [EPI1944164](https://platform.epicov.org/epi3/start/EPI/1944164) | Germany | 2021-Mar-07 | [EPI_ISL_5116064](https://platform.epicov.org/epi3/start/EPI_ISL/5116064) | A/turkey/Germany-NI/AI02349/2021 | Lebensmittel- und Veterinärinstitut Oldenburg - Standort Veterinärinstitut | Friedrich-Loeffler-Institut |  |
| [EPI1944171](https://platform.epicov.org/epi3/start/EPI/1944171) | Germany | 2021-Mar-05 | [EPI_ISL_5115956](https://platform.epicov.org/epi3/start/EPI_ISL/5115956) | A/turkey/Germany-NI/AI02306/2021 | Lebensmittel- und Veterinärinstitut Oldenburg - Standort Veterinärinstitut | Friedrich-Loeffler-Institut |  |
| [EPI1944172](https://platform.epicov.org/epi3/start/EPI/1944172) | Germany | 2021-Mar-05 | [EPI_ISL_5115955](https://platform.epicov.org/epi3/start/EPI_ISL/5115955) | A/turkey/Germany-NI/AI02303/2021 | Lebensmittel- und Veterinärinstitut Oldenburg - Standort Veterinärinstitut | Friedrich-Loeffler-Institut |  |
| [EPI1944175](https://platform.epicov.org/epi3/start/EPI/1944175) | Germany | 2021-Mar-04 | [EPI_ISL_5115620](https://platform.epicov.org/epi3/start/EPI_ISL/5115620) | A/turkey/Germany-NI/AI02128/2021 | Lebensmittel- und Veterinärinstitut Oldenburg - Standort Veterinärinstitut | Friedrich-Loeffler-Institut |  |
| [EPI1954433](https://platform.epicov.org/epi3/start/EPI/1954433) | Germany | 2021-Mar-04 | [EPI_ISL_5115619](https://platform.epicov.org/epi3/start/EPI_ISL/5115619) | A/turkey/Germany-NI/AI02122/2021 | Lebensmittel- und Veterinärinstitut Oldenburg - Standort Veterinärinstitut | Friedrich-Loeffler-Institut |  |
| [EPI1944189](https://platform.epicov.org/epi3/start/EPI/1944189) | Germany | 2021-Mar-03 | [EPI_ISL_5100599](https://platform.epicov.org/epi3/start/EPI_ISL/5100599) | A/turkey/Germany-NI/AI02025/2021 | Lebensmittel- und Veterinärinstitut Oldenburg - Standort Veterinärinstitut | Friedrich-Loeffler-Institut |  |
| [EPI1944190](https://platform.epicov.org/epi3/start/EPI/1944190) | Germany | 2021-Feb-28 | [EPI_ISL_5100056](https://platform.epicov.org/epi3/start/EPI_ISL/5100056) | A/turkey/Germany-NI/AI02013/2021 | Lebensmittel- und Veterinärinstitut Oldenburg - Standort Veterinärinstitut | Friedrich-Loeffler-Institut |  |
| [EPI1944194](https://platform.epicov.org/epi3/start/EPI/1944194) | Germany | 2021-Feb-27 | [EPI_ISL_5099474](https://platform.epicov.org/epi3/start/EPI_ISL/5099474) | A/turkey/Germany-NI/AI01805/2021 | Lebensmittel- und Veterinärinstitut Oldenburg - Standort Veterinärinstitut | Friedrich-Loeffler-Institut |  |
| [EPI1944195](https://platform.epicov.org/epi3/start/EPI/1944195) | Germany | 2021-Feb-27 | [EPI_ISL_5099468](https://platform.epicov.org/epi3/start/EPI_ISL/5099468) | A/turkey/Germany-NI/AI01799/2021 | Lebensmittel- und Veterinärinstitut Oldenburg - Standort Veterinärinstitut | Friedrich-Loeffler-Institut |  |
| [EPI1954373](https://platform.epicov.org/epi3/start/EPI/1954373) | Germany | 2021-Jan-14 | [EPI_ISL_5098133](https://platform.epicov.org/epi3/start/EPI_ISL/5098133) | A/turkey/Germany-NI/AI00591/2021 | Lebensmittel- und Veterinärinstitut Oldenburg - Standort Veterinärinstitut | Friedrich-Loeffler-Institut |  |
| [EPI1954374](https://platform.epicov.org/epi3/start/EPI/1954374) | Germany | 2021-Jan-15 | [EPI_ISL_5098132](https://platform.epicov.org/epi3/start/EPI_ISL/5098132) | A/turkey/Germany-NI/AI00616/2021 | Lebensmittel- und Veterinärinstitut Oldenburg - Standort Veterinärinstitut | Friedrich-Loeffler-Institut |  |
| [EPI1954375](https://platform.epicov.org/epi3/start/EPI/1954375) | Germany | 2021-Jan-15 | [EPI_ISL_5098130](https://platform.epicov.org/epi3/start/EPI_ISL/5098130) | A/turkey/Germany-NI/AI00612/2021 | Lebensmittel- und Veterinärinstitut Oldenburg - Standort Veterinärinstitut | Friedrich-Loeffler-Institut |  |
| [EPI1954376](https://platform.epicov.org/epi3/start/EPI/1954376) | Germany | 2021-Jan-17 | [EPI_ISL_5097280](https://platform.epicov.org/epi3/start/EPI_ISL/5097280) | A/turkey/Germany-NI/AI00621/2021 | Lebensmittel- und Veterinärinstitut Oldenburg - Standort Veterinärinstitut | Friedrich-Loeffler-Institut |  |
| [EPI1954378](https://platform.epicov.org/epi3/start/EPI/1954378) | Germany | 2021-Jan-20 | [EPI_ISL_5096107](https://platform.epicov.org/epi3/start/EPI_ISL/5096107) | A/turkey/Germany-NI/AI00647/2021 | Lebensmittel- und Veterinärinstitut Oldenburg - Standort Veterinärinstitut | Friedrich-Loeffler-Institut |  |
| [EPI1954388](https://platform.epicov.org/epi3/start/EPI/1954388) | Germany | 2021-Jan-12 | [EPI_ISL_5095556](https://platform.epicov.org/epi3/start/EPI_ISL/5095556) | A/turkey/Germany-NI/AI00589/2021 | Lebensmittel- und Veterinärinstitut Oldenburg - Standort Veterinärinstitut | Friedrich-Loeffler-Institut |  |
| [EPI1954395](https://platform.epicov.org/epi3/start/EPI/1954395) | Germany | 2021-Jan-11 | [EPI_ISL_5095322](https://platform.epicov.org/epi3/start/EPI_ISL/5095322) | A/turkey/Germany-NI/AI00439/2021 | Lebensmittel- und Veterinärinstitut Oldenburg - Standort Veterinärinstitut | Friedrich-Loeffler-Institut |  |
| [EPI1954396](https://platform.epicov.org/epi3/start/EPI/1954396) | Germany | 2021-Jan-08 | [EPI_ISL_5095321](https://platform.epicov.org/epi3/start/EPI_ISL/5095321) | A/turkey/Germany-NI/AI00429/2021 | Lebensmittel- und Veterinärinstitut Oldenburg - Standort Veterinärinstitut | Friedrich-Loeffler-Institut |  |
| [EPI1954397](https://platform.epicov.org/epi3/start/EPI/1954397) | Germany | 2021-Jan-06 | [EPI_ISL_5095320](https://platform.epicov.org/epi3/start/EPI_ISL/5095320) | A/turkey/Germany-NI/AI00406/2021 | Lebensmittel- und Veterinärinstitut Oldenburg - Standort Veterinärinstitut | Friedrich-Loeffler-Institut |  |
| [EPI1954398](https://platform.epicov.org/epi3/start/EPI/1954398) | Germany | 2021-Jan-06 | [EPI_ISL_5095319](https://platform.epicov.org/epi3/start/EPI_ISL/5095319) | A/turkey/Germany-NI/AI00402/2021 | Lebensmittel- und Veterinärinstitut Oldenburg - Standort Veterinärinstitut | Friedrich-Loeffler-Institut |  |
| [EPI1954400](https://platform.epicov.org/epi3/start/EPI/1954400) | Germany | 2021-Jan-04 | [EPI_ISL_5067335](https://platform.epicov.org/epi3/start/EPI_ISL/5067335) | A/turkey/Germany-NI/AI00072/2021 | Lebensmittel- und Veterinärinstitut Oldenburg - Standort Veterinärinstitut | Friedrich-Loeffler-Institut |  |
| [EPI1954401](https://platform.epicov.org/epi3/start/EPI/1954401) | Germany | 2021-Jan-04 | [EPI_ISL_5067044](https://platform.epicov.org/epi3/start/EPI_ISL/5067044) | A/turkey/Germany-NI/AI00063/2021 | Lebensmittel- und Veterinärinstitut Oldenburg - Standort Veterinärinstitut | Friedrich-Loeffler-Institut |  |
| [EPI1954402](https://platform.epicov.org/epi3/start/EPI/1954402) | Germany | 2020-Dec-20 | [EPI_ISL_5066996](https://platform.epicov.org/epi3/start/EPI_ISL/5066996) | A/turkey/Germany-NI/AI03432/2020 | Lebensmittel- und Veterinärinstitut Oldenburg - Standort Veterinärinstitut | Friedrich-Loeffler-Institut |  |
| [EPI1954403](https://platform.epicov.org/epi3/start/EPI/1954403) | Germany | 2020-Dec-29 | [EPI_ISL_5066982](https://platform.epicov.org/epi3/start/EPI_ISL/5066982) | A/turkey/Germany-NI/AI03654/2020 | Lebensmittel- und Veterinärinstitut Oldenburg - Standort Veterinärinstitut | Friedrich-Loeffler-Institut |  |
| [EPI1954404](https://platform.epicov.org/epi3/start/EPI/1954404) | Germany | 2020-Dec-21 | [EPI_ISL_5066981](https://platform.epicov.org/epi3/start/EPI_ISL/5066981) | A/turkey/Germany-NI/AI03452/2020 | Lebensmittel- und Veterinärinstitut Oldenburg - Standort Veterinärinstitut | Friedrich-Loeffler-Institut |  |
| [EPI1954405](https://platform.epicov.org/epi3/start/EPI/1954405) | Germany | 2021-Jan-02 | [EPI_ISL_5065276](https://platform.epicov.org/epi3/start/EPI_ISL/5065276) | A/turkey/Germany-NI/AI00042/2021 | Lebensmittel- und Veterinärinstitut Oldenburg - Standort Veterinärinstitut | Friedrich-Loeffler-Institut |  |
| [EPI1954406](https://platform.epicov.org/epi3/start/EPI/1954406) | Germany | 2021-Jan-02 | [EPI_ISL_5065144](https://platform.epicov.org/epi3/start/EPI_ISL/5065144) | A/turkey/Germany-NI/AI00038/2021 | Lebensmittel- und Veterinärinstitut Oldenburg - Standort Veterinärinstitut | Friedrich-Loeffler-Institut |  |
| [EPI1954407](https://platform.epicov.org/epi3/start/EPI/1954407) | Germany | 2020-Dec-31 | [EPI_ISL_5065068](https://platform.epicov.org/epi3/start/EPI_ISL/5065068) | A/turkey/Germany-NI/AI00016/2021 | Lebensmittel- und Veterinärinstitut Oldenburg - Standort Veterinärinstitut | Friedrich-Loeffler-Institut |  |
| [EPI1954408](https://platform.epicov.org/epi3/start/EPI/1954408) | Germany | 2020-Dec-26 | [EPI_ISL_5064971](https://platform.epicov.org/epi3/start/EPI_ISL/5064971) | A/turkey/Germany-NI/AI03609/2020 | Lebensmittel- und Veterinärinstitut Oldenburg - Standort Veterinärinstitut | Friedrich-Loeffler-Institut |  |
| [EPI1954409](https://platform.epicov.org/epi3/start/EPI/1954409) | Germany | 2020-Dec-26 | [EPI_ISL_5064922](https://platform.epicov.org/epi3/start/EPI_ISL/5064922) | A/turkey/Germany-NI/AI03606/2020 | Lebensmittel- und Veterinärinstitut Oldenburg - Standort Veterinärinstitut | Friedrich-Loeffler-Institut |  |
| [EPI1954410](https://platform.epicov.org/epi3/start/EPI/1954410) | Germany | 2020-Dec-26 | [EPI_ISL_5064825](https://platform.epicov.org/epi3/start/EPI_ISL/5064825) | A/turkey/Germany-NI/AI03599/2020 | Lebensmittel- und Veterinärinstitut Oldenburg - Standort Veterinärinstitut | Friedrich-Loeffler-Institut |  |
| [EPI1954411](https://platform.epicov.org/epi3/start/EPI/1954411) | Germany | 2020-Dec-25 | [EPI_ISL_5064707](https://platform.epicov.org/epi3/start/EPI_ISL/5064707) | A/turkey/Germany-NI/AI03594/2020 | Lebensmittel- und Veterinärinstitut Oldenburg - Standort Veterinärinstitut | Friedrich-Loeffler-Institut |  |
| [EPI1954412](https://platform.epicov.org/epi3/start/EPI/1954412) | Germany | 2020-Dec-23 | [EPI_ISL_5064509](https://platform.epicov.org/epi3/start/EPI_ISL/5064509) | A/turkey/Germany-NI/AI03584/2020 | Lebensmittel- und Veterinärinstitut Oldenburg - Standort Veterinärinstitut | Friedrich-Loeffler-Institut |  |
| [EPI1954413](https://platform.epicov.org/epi3/start/EPI/1954413) | Germany | 2020-Dec-21 | [EPI_ISL_5064270](https://platform.epicov.org/epi3/start/EPI_ISL/5064270) | A/turkey/Germany-NI/AI03453/2020 | Lebensmittel- und Veterinärinstitut Oldenburg - Standort Veterinärinstitut | Friedrich-Loeffler-Institut |  |
| [EPI1944202](https://platform.epicov.org/epi3/start/EPI/1944202) | Germany | 2021-Feb-19 | [EPI_ISL_5099368](https://platform.epicov.org/epi3/start/EPI_ISL/5099368) | A/turkey/Germany-MV/AI01477/2021 | Bayrisches Landesamt für Gesundheit und Lebensmittelsicherheit (LGL) | Friedrich-Loeffler-Institut |  |
| [EPI1943888](https://platform.epicov.org/epi3/start/EPI/1943888) | Germany | 2021-Mar-18 | [EPI_ISL_5142451](https://platform.epicov.org/epi3/start/EPI_ISL/5142451) | A/turkey/Germany-NW/AI03104/2021 | Chemisches und Veterinäruntersuchungsamt Münsterland-Emscher-Lippe | Friedrich-Loeffler-Institut |  |
| [EPI2015017](https://platform.epicov.org/epi3/start/EPI/2015017) | Romania | 2022-Feb-10 | [EPI_ISL_11922819](https://platform.epicov.org/epi3/start/EPI_ISL/11922819) | A/laying_hen/Romania/10470_22VIR2749-5/2022 | Institute for Diagnosis & Animal Health (IDAH) | Istituto Zooprofilattico Sperimentale delle Venezie | Barbuceanu, F.; Onita, I.; Neicut, A.; Motiu, R.; Burlacu, R.; Barbierato, G.; Zecchin, B.; Fusaro, A.; Schivo, A.; Salviato, A.; Palumbo, E.; Giussani, E.; Monne, I.; Terregino, C. |
| [EPI2015069](https://platform.epicov.org/epi3/start/EPI/2015069) | Denmark | 2021-Oct-28 | [EPI_ISL_11798577](https://platform.epicov.org/epi3/start/EPI_ISL/11798577) | A/gray_heron/Denmark/24326-1.02/2021-10-28 | Statens Serumm Institute | Statens Serum Institute | Charlotte Hjulsager, Yuan Liang |
| [EPI2132607](https://platform.epicov.org/epi3/start/EPI/2132607) | Germany | 2022-May-31 | [EPI_ISL_14573037](https://platform.epicov.org/epi3/start/EPI_ISL/14573037) | A/sandwich tern/Germany-MV/AI03131/2022 | Landesamt für Landwirtschaft, Lebensmittelsicherheit und Fischerei (LALLF) | Friedrich-Loeffler-Institut |  |
| [EPI1944163](https://platform.epicov.org/epi3/start/EPI/1944163) | Germany | 2021-Mar-02 | [EPI_ISL_5116065](https://platform.epicov.org/epi3/start/EPI_ISL/5116065) | A/greater rhea/Germany-SN/AI02351/2021 | Landesuntersuchungsanstalt für das Gesundheits- und Veterinärwesen Sachsen | Friedrich-Loeffler-Institut |  |
| [EPI2244367](https://platform.epicov.org/epi3/start/EPI/2244367) | Germany | 2022-Jul-08 | [EPI_ISL_16122154](https://platform.epicov.org/epi3/start/EPI_ISL/16122154) | A/northern gannet/Germany-NI/AI04234/2022 | Lebensmittel- und Veterinärinstitut Oldenburg - Standort Veterinärinstitut | Friedrich-Loeffler-Institut |  |
| [EPI2242456](https://platform.epicov.org/epi3/start/EPI/2242456) | Germany | 2022-Jul-14 | [EPI_ISL_16098026](https://platform.epicov.org/epi3/start/EPI_ISL/16098026) | A/common tern/Germany-NI/AI04284/2022 | Lebensmittel- und Veterinärinstitut Oldenburg - Standort Veterinärinstitut | Friedrich-Loeffler-Institut |  |
| [EPI2132628](https://platform.epicov.org/epi3/start/EPI/2132628) | Germany | 2022-Jun-02 | [EPI_ISL_14573044](https://platform.epicov.org/epi3/start/EPI_ISL/14573044) | A/sandwich tern/Germany-NI/AI03181/2022 | Lebensmittel- und Veterinärinstitut Oldenburg - Standort Veterinärinstitut | Friedrich-Loeffler-Institut |  |
| [EPI2132616](https://platform.epicov.org/epi3/start/EPI/2132616) | Germany | 2022-Jun-02 | [EPI_ISL_14573043](https://platform.epicov.org/epi3/start/EPI_ISL/14573043) | A/sandwich tern/Germany-NI/AI03180/2022 | Lebensmittel- und Veterinärinstitut Oldenburg - Standort Veterinärinstitut | Friedrich-Loeffler-Institut |  |
| [EPI1987722](https://platform.epicov.org/epi3/start/EPI/1987722) | Germany | 2021-Dec-28 | [EPI_ISL_10347326](https://platform.epicov.org/epi3/start/EPI_ISL/10347326) | A/long-eared owl/Germany-NI/AI09037/2021 | Lebensmittel- und Veterinärinstitut Oldenburg - Standort Veterinärinstitut | Friedrich-Loeffler-Institut |  |
| [EPI1943854](https://platform.epicov.org/epi3/start/EPI/1943854) | Germany | 2021-Jul-17 | [EPI_ISL_5145744](https://platform.epicov.org/epi3/start/EPI_ISL/5145744) | A/oystercatcher/Germany-NI/AI05047/2021 | Lebensmittel- und Veterinärinstitut Oldenburg - Standort Veterinärinstitut | Friedrich-Loeffler-Institut |  |
| [EPI1954432](https://platform.epicov.org/epi3/start/EPI/1954432) | Germany | 2020-Dec-30 | [EPI_ISL_1206285](https://platform.epicov.org/epi3/start/EPI_ISL/1206285) | A/red knot/Germany-NI/AI00394/2020 | Lebensmittel- und Veterinärinstitut Oldenburg - Standort Veterinärinstitut | Friedrich-Loeffler-Institut |  |
| [EPI1944148](https://platform.epicov.org/epi3/start/EPI/1944148) | Germany | 2021-Mar-10 | [EPI_ISL_5126214](https://platform.epicov.org/epi3/start/EPI_ISL/5126214) | A/eagle owl/Germany-ST/AI02542/2021 | Landesamt für Verbraucherschutz Sachsen-Anhalt | Friedrich-Loeffler-Institut |  |
| [EPI2242291](https://platform.epicov.org/epi3/start/EPI/2242291) | Germany | 2022-Jun-30 | [EPI_ISL_16096040](https://platform.epicov.org/epi3/start/EPI_ISL/16096040) | A/artic tern/Germany-SH/AI03798/2022 | Landeslabor Schleswig-Holstein | Friedrich-Loeffler-Institut |  |
| [EPI2132661](https://platform.epicov.org/epi3/start/EPI/2132661) | Germany | 2022-Jun-09 | [EPI_ISL_14573054](https://platform.epicov.org/epi3/start/EPI_ISL/14573054) | A/sandwich tern/Germany-SH/AI03497/2022 | Landeslabor Schleswig-Holstein | Friedrich-Loeffler-Institut |  |
| [EPI2132647](https://platform.epicov.org/epi3/start/EPI/2132647) | Germany | 2022-Jun-07 | [EPI_ISL_14573052](https://platform.epicov.org/epi3/start/EPI_ISL/14573052) | A/sandwich tern/Germany-SH/AI03335/2022 | Landeslabor Schleswig-Holstein | Friedrich-Loeffler-Institut |  |
| [EPI2132639](https://platform.epicov.org/epi3/start/EPI/2132639) | Germany | 2022-Jun-07 | [EPI_ISL_14573045](https://platform.epicov.org/epi3/start/EPI_ISL/14573045) | A/sandwich tern/Germany-SH/AI03333/2022 | Landeslabor Schleswig-Holstein | Friedrich-Loeffler-Institut |  |
| [EPI2132564](https://platform.epicov.org/epi3/start/EPI/2132564) | Germany | 2022-Jun-15 | [EPI_ISL_14573031](https://platform.epicov.org/epi3/start/EPI_ISL/14573031) | A/northern gannet/Germany-SH/AI03498/2022 | Landeslabor Schleswig-Holstein | Friedrich-Loeffler-Institut |  |
| [EPI2132550](https://platform.epicov.org/epi3/start/EPI/2132550) | Germany | 2022-Jun-16 | [EPI_ISL_14573001](https://platform.epicov.org/epi3/start/EPI_ISL/14573001) | A/northern gannet/Germany-SH/AI03496/2022 | Landeslabor Schleswig-Holstein | Friedrich-Loeffler-Institut |  |
| [EPI1988853](https://platform.epicov.org/epi3/start/EPI/1988853) | Germany | 2022-Jan-25 | [EPI_ISL_10497305](https://platform.epicov.org/epi3/start/EPI_ISL/10497305) | A/red knot/Germany-SH/AI01010/2022 | Landeslabor Schleswig-Holstein | Friedrich-Loeffler-Institut |  |
| [EPI1954419](https://platform.epicov.org/epi3/start/EPI/1954419) | Germany | 2020-Nov-06 | [EPI_ISL_5062078](https://platform.epicov.org/epi3/start/EPI_ISL/5062078) | A/Eurasian oystercatcher/Germany-SH/AI02269/2020 | Landeslabor Schleswig-Holstein | Friedrich-Loeffler-Institut |  |
| [EPI1850160](https://platform.epicov.org/epi3/start/EPI/1850160) | Germany | 2020-Dec-16 | [EPI_ISL_1205489](https://platform.epicov.org/epi3/start/EPI_ISL/1205489) | A/red knot/Germany-SH/AI03424/2020 | Landeslabor Schleswig-Holstein | Friedrich-Loeffler-Institut |  |
| [EPI1850152](https://platform.epicov.org/epi3/start/EPI/1850152) | Germany | 2020-Dec-14 | [EPI_ISL_1205487](https://platform.epicov.org/epi3/start/EPI_ISL/1205487) | A/red knot/Germany-SH/AI03421/2020 | Landeslabor Schleswig-Holstein | Friedrich-Loeffler-Institut |  |
| [EPI1850144](https://platform.epicov.org/epi3/start/EPI/1850144) | Germany | 2020-Dec-14 | [EPI_ISL_1205485](https://platform.epicov.org/epi3/start/EPI_ISL/1205485) | A/red knot/Germany-SH/AI03419/2020 | Landeslabor Schleswig-Holstein | Friedrich-Loeffler-Institut |  |
| [EPI2455236](https://platform.epicov.org/epi3/start/EPI/2455236) | Romania | 2022-Nov-17 | [EPI_ISL_17165501](https://platform.epicov.org/epi3/start/EPI_ISL/17165501) | A/cygnus_cygnus/Romania/17198_23VIR1145-2/2022 | Institute for Diagnosis & Animal Health (IDAH) | Istituto Zooprofilattico Sperimentale Delle Venezie | Barbuceanu, F.; Onita, I.; Neicut, A.; Motiu, R.; Burlacu, R.; Pastori, A.; Zecchin, B.; Fusaro, A.; Schivo, A.; Salviato, A.; Palumbo, E.; Giussani, E.; Monne, I.; Terregino, C. |
| [EPI2455228](https://platform.epicov.org/epi3/start/EPI/2455228) | Romania | 2022-Nov-15 | [EPI_ISL_17165500](https://platform.epicov.org/epi3/start/EPI_ISL/17165500) | A/cygnus_olor/Romania/17142_23VIR1145-1/2022 | Institute for Diagnosis & Animal Health (IDAH) | Istituto Zooprofilattico Sperimentale Delle Venezie | Barbuceanu, F.; Onita, I.; Neicut, A.; Motiu, R.; Burlacu, R.; Pastori, A.; Zecchin, B.; Fusaro, A.; Schivo, A.; Salviato, A.; Palumbo, E.; Giussani, E.; Monne, I.; Terregino, C. |
| [EPI2202488](https://platform.epicov.org/epi3/start/EPI/2202488) | Germany | 2020-Nov-01 | [EPI_ISL_15620543](https://platform.epicov.org/epi3/start/EPI_ISL/15620543) | A/environment/Germany/5/2020 |  | Import from public-domain | Ahrens,A.K.; Selinka,H.-C.; Szewzyk,R.; Wylezich,C.; Wonnemann,H.; Sindt,O.; Hellmer,H.H.; Pfaff,F.; Hoeper,D.; Mettenleiter,T.C.; Beer,M.; Harder,T.C. |
| [EPI2012875](https://platform.epicov.org/epi3/start/EPI/2012875) | Denmark | 2021-Oct-13 | [EPI_ISL_11798572](https://platform.epicov.org/epi3/start/EPI_ISL/11798572) | A/Eurasian_wigeon/Denmark/24066-9/2021-10-13 | Statens Serumm Institute | Statens Serum Institute | Charlotte Hjulsager, Yuan Liang |
| [EPI1945203](https://platform.epicov.org/epi3/start/EPI/1945203) | Germany | 2021-Oct-20 | [EPI_ISL_7753329](https://platform.epicov.org/epi3/start/EPI_ISL/7753329) | A/white stork/Germany-MV/AI05979/2021 | Landesamt für Landwirtschaft, Lebensmittelsicherheit und Fischerei (LALLF) | Friedrich-Loeffler-Institut |  |
| [EPI1945291](https://platform.epicov.org/epi3/start/EPI/1945291) | Germany | 2021-Oct-26 | [EPI_ISL_7753443](https://platform.epicov.org/epi3/start/EPI_ISL/7753443) | A/buzzard/Germany-SH/AI06210/2021 | Landeslabor Schleswig-Holstein | Friedrich-Loeffler-Institut |  |
| [EPI1945275](https://platform.epicov.org/epi3/start/EPI/1945275) | Germany | 2021-Oct-25 | [EPI_ISL_7753407](https://platform.epicov.org/epi3/start/EPI_ISL/7753407) | A/barnacle goose/Germany-SH/AI06145/2021 | Landeslabor Schleswig-Holstein | Friedrich-Loeffler-Institut |  |
| [EPI1945259](https://platform.epicov.org/epi3/start/EPI/1945259) | Germany | 2021-Oct-22 | [EPI_ISL_7753405](https://platform.epicov.org/epi3/start/EPI_ISL/7753405) | A/Eurasian wigeon/Germany-SH/AI06142/2021 | Landeslabor Schleswig-Holstein | Friedrich-Loeffler-Institut |  |
| [EPI1945332](https://platform.epicov.org/epi3/start/EPI/1945332) | Germany | 2021-Oct-22 | [EPI_ISL_7753387](https://platform.epicov.org/epi3/start/EPI_ISL/7753387) | A/Eurasian wigeon/Germany-SH/AI06143/2021 | Landeslabor Schleswig-Holstein | Friedrich-Loeffler-Institut |  |
| [EPI1945227](https://platform.epicov.org/epi3/start/EPI/1945227) | Germany | 2021-Oct-22 | [EPI_ISL_7753387](https://platform.epicov.org/epi3/start/EPI_ISL/7753387) | A/Eurasian wigeon/Germany-SH/AI06143/2021 | Landeslabor Schleswig-Holstein | Friedrich-Loeffler-Institut |  |
| [EPI1945155](https://platform.epicov.org/epi3/start/EPI/1945155) | Germany | 2021-Oct-14 | [EPI_ISL_7753211](https://platform.epicov.org/epi3/start/EPI_ISL/7753211) | A/Eurasian wigeon/Germany-SH/AI05954/2021 | Landeslabor Schleswig-Holstein | Friedrich-Loeffler-Institut |  |
| [EPI1945147](https://platform.epicov.org/epi3/start/EPI/1945147) | Germany | 2021-Oct-14 | [EPI_ISL_7753193](https://platform.epicov.org/epi3/start/EPI_ISL/7753193) | A/Eurasian wigeon/Germany-SH/AI05951/2021 | Landeslabor Schleswig-Holstein | Friedrich-Loeffler-Institut |  |
| [EPI1945139](https://platform.epicov.org/epi3/start/EPI/1945139) | Germany | 2021-Oct-14 | [EPI_ISL_7753173](https://platform.epicov.org/epi3/start/EPI_ISL/7753173) | A/Eurasian wigeon/Germany-SH/AI05956/2021 | Landeslabor Schleswig-Holstein | Friedrich-Loeffler-Institut |  |
| [EPI1945131](https://platform.epicov.org/epi3/start/EPI/1945131) | Germany | 2021-Oct-14 | [EPI_ISL_7753152](https://platform.epicov.org/epi3/start/EPI_ISL/7753152) | A/Eurasian wigeon/Germany-SH/AI05953/2021 | Landeslabor Schleswig-Holstein | Friedrich-Loeffler-Institut |  |
| [EPI1945123](https://platform.epicov.org/epi3/start/EPI/1945123) | Germany | 2021-Oct-14 | [EPI_ISL_7753130](https://platform.epicov.org/epi3/start/EPI_ISL/7753130) | A/Eurasian wigeon/Germany-SH/AI05955/2021 | Landeslabor Schleswig-Holstein | Friedrich-Loeffler-Institut |  |
| [EPI1945108](https://platform.epicov.org/epi3/start/EPI/1945108) | Germany | 2021-Oct-14 | [EPI_ISL_7748262](https://platform.epicov.org/epi3/start/EPI_ISL/7748262) | A/Eurasian wigeon/Germany-SH/AI05952/2021 | Landeslabor Schleswig-Holstein | Friedrich-Loeffler-Institut |  |
| [EPI1945084](https://platform.epicov.org/epi3/start/EPI/1945084) | Germany | 2021-Oct-14 | [EPI_ISL_7748001](https://platform.epicov.org/epi3/start/EPI_ISL/7748001) | A/Eurasian curlew/Germany-SH/AI05960/2021 | Landeslabor Schleswig-Holstein | Friedrich-Loeffler-Institut |  |
| [EPI1945219](https://platform.epicov.org/epi3/start/EPI/1945219) | Germany | 2021-Oct-21 | [EPI_ISL_7753367](https://platform.epicov.org/epi3/start/EPI_ISL/7753367) | A/Eurasian teal/Germany-BY/AI05977/2021 | Bayrisches Landesamt für Gesundheit und Lebensmittelsicherheit (LGL) | Friedrich-Loeffler-Institut |  |
| [EPI2011648](https://platform.epicov.org/epi3/start/EPI/2011648) | Denmark | 2021-Nov-02 | [EPI_ISL_11798570](https://platform.epicov.org/epi3/start/EPI_ISL/11798570) | A/chicken/Denmark/24357-11/2021-11-02 | Statens Serumm Institute | Statens Serum Institute | Charlotte Hjulsager, Yuan Liang |
| [EPI1883070](https://platform.epicov.org/epi3/start/EPI/1883070) | Denmark | 2020-Nov-15 | [EPI_ISL_984695](https://platform.epicov.org/epi3/start/EPI_ISL/984695) | A/chicken/Denmark/14819-6/2020 | Statens Serumm Institute | Statens Serum Institute | Yuan Liang, Charlotte Hjulsager |
| [EPI1943864](https://platform.epicov.org/epi3/start/EPI/1943864) | Germany | 2021-Mar-20 | [EPI_ISL_5144407](https://platform.epicov.org/epi3/start/EPI_ISL/5144407) | A/chicken/Germany-NW/AI03154/2021 | Chemisches und Veterinäruntersuchungsamt Ostwestfalen-Lippe | Friedrich-Loeffler-Institut |  |
| [EPI1943866](https://platform.epicov.org/epi3/start/EPI/1943866) | Germany | 2021-Mar-20 | [EPI_ISL_5144341](https://platform.epicov.org/epi3/start/EPI_ISL/5144341) | A/chicken/Germany-NW/AI03148/2021 | Chemisches und Veterinäruntersuchungsamt Ostwestfalen-Lippe | Friedrich-Loeffler-Institut |  |
| [EPI1943847](https://platform.epicov.org/epi3/start/EPI/1943847) | Germany | 2021-Mar-31 | [EPI_ISL_5146288](https://platform.epicov.org/epi3/start/EPI_ISL/5146288) | A/chicken/Germany-NW/AI03705/2021 | Chemisches und Veterinäruntersuchungsamt Westfalen-Arnsberg (CVUA-Westfalen) | Friedrich-Loeffler-Institut |  |
| [EPI1944187](https://platform.epicov.org/epi3/start/EPI/1944187) | Germany | 2021-Mar-01 | [EPI_ISL_5102130](https://platform.epicov.org/epi3/start/EPI_ISL/5102130) | A/chicken/Germany-NW/AI02054/2021 | Chemisches und Veterinäruntersuchungsamt Westfalen-Arnsberg (CVUA-Westfalen) | Friedrich-Loeffler-Institut |  |
| [EPI1944181](https://platform.epicov.org/epi3/start/EPI/1944181) | Germany | 2021-Feb-26 | [EPI_ISL_5115614](https://platform.epicov.org/epi3/start/EPI_ISL/5115614) | A/chicken/Germany-BE/AI01974/2021 | Landeslabor Brandenburg-Berlin | Friedrich-Loeffler-Institut |  |
| [EPI1943848](https://platform.epicov.org/epi3/start/EPI/1943848) | Germany | 2021-Mar-29 | [EPI_ISL_5146171](https://platform.epicov.org/epi3/start/EPI_ISL/5146171) | A/chicken/Germany-BW/AI03634/2021 | CVUA Karlsruhe | Friedrich-Loeffler-Institut |  |
| [EPI1943849](https://platform.epicov.org/epi3/start/EPI/1943849) | Germany | 2021-Mar-24 | [EPI_ISL_5145921](https://platform.epicov.org/epi3/start/EPI_ISL/5145921) | A/chicken/Germany-BW/AI03554/2021 | CVUA Karlsruhe | Friedrich-Loeffler-Institut |  |
| [EPI1943869](https://platform.epicov.org/epi3/start/EPI/1943869) | Germany | 2021-Mar-22 | [EPI_ISL_5143820](https://platform.epicov.org/epi3/start/EPI_ISL/5143820) | A/chicken/Germany-BW/AI03205/2021 | CVUA Karlsruhe | Friedrich-Loeffler-Institut |  |
| [EPI2009951](https://platform.epicov.org/epi3/start/EPI/2009951) | Germany | 2021-Nov-02 | [EPI_ISL_11725988](https://platform.epicov.org/epi3/start/EPI_ISL/11725988) | A/chicken/Germany-BB/AI06242/2021 | Landeslabor Berlin-Brandenburg | Friedrich-Loeffler-Institut |  |
| [EPI2009943](https://platform.epicov.org/epi3/start/EPI/2009943) | Germany | 2021-Oct-29 | [EPI_ISL_11725962](https://platform.epicov.org/epi3/start/EPI_ISL/11725962) | A/chicken/Germany-BB/AI06219/2021 | Landeslabor Berlin-Brandenburg | Friedrich-Loeffler-Institut |  |
| [EPI1944155](https://platform.epicov.org/epi3/start/EPI/1944155) | Germany | 2021-Mar-08 | [EPI_ISL_5116326](https://platform.epicov.org/epi3/start/EPI_ISL/5116326) | A/chicken/Germany-MV/AI02376/2021 | Landesamt für Landwirtschaft, Lebensmittelsicherheit und Fischerei (LALLF) | Friedrich-Loeffler-Institut |  |
| [EPI1944174](https://platform.epicov.org/epi3/start/EPI/1944174) | Germany | 2021-Mar-04 | [EPI_ISL_5115621](https://platform.epicov.org/epi3/start/EPI_ISL/5115621) | A/chicken/Germany-MV/AI02141/2021 | Landesamt für Landwirtschaft, Lebensmittelsicherheit und Fischerei (LALLF) | Friedrich-Loeffler-Institut |  |
| [EPI1944182](https://platform.epicov.org/epi3/start/EPI/1944182) | Germany | 2021-Mar-01 | [EPI_ISL_5115613](https://platform.epicov.org/epi3/start/EPI_ISL/5115613) | A/chicken/Germany-MV/AI01965/2021 | Landesamt für Landwirtschaft, Lebensmittelsicherheit und Fischerei (LALLF) | Friedrich-Loeffler-Institut |  |
| [EPI1944183](https://platform.epicov.org/epi3/start/EPI/1944183) | Germany | 2021-Feb-12 | [EPI_ISL_5102578](https://platform.epicov.org/epi3/start/EPI_ISL/5102578) | A/chicken/Germany-MV/AI01407/2021 | Landesamt für Landwirtschaft, Lebensmittelsicherheit und Fischerei (LALLF) | Friedrich-Loeffler-Institut |  |
| [EPI1944196](https://platform.epicov.org/epi3/start/EPI/1944196) | Germany | 2021-Feb-26 | [EPI_ISL_5099463](https://platform.epicov.org/epi3/start/EPI_ISL/5099463) | A/chicken/Germany-MV/AI01794/2021 | Landesamt für Landwirtschaft, Lebensmittelsicherheit und Fischerei (LALLF) | Friedrich-Loeffler-Institut |  |
| [EPI1944200](https://platform.epicov.org/epi3/start/EPI/1944200) | Germany | 2021-Feb-22 | [EPI_ISL_5099373](https://platform.epicov.org/epi3/start/EPI_ISL/5099373) | A/chicken/Germany-MV/AI01587/2021 | Landesamt für Landwirtschaft, Lebensmittelsicherheit und Fischerei (LALLF) | Friedrich-Loeffler-Institut |  |
| [EPI1944211](https://platform.epicov.org/epi3/start/EPI/1944211) | Germany | 2021-Feb-08 | [EPI_ISL_5098146](https://platform.epicov.org/epi3/start/EPI_ISL/5098146) | A/chicken/Germany-MV/AI01347/2021 | Landesamt für Landwirtschaft, Lebensmittelsicherheit und Fischerei (LALLF) | Friedrich-Loeffler-Institut |  |
| [EPI1954390](https://platform.epicov.org/epi3/start/EPI/1954390) | Germany | 2021-Jan-12 | [EPI_ISL_5095554](https://platform.epicov.org/epi3/start/EPI_ISL/5095554) | A/chicken/Germany-MV/AI00539/2021 | Landesamt für Landwirtschaft, Lebensmittelsicherheit und Fischerei (LALLF) | Friedrich-Loeffler-Institut |  |
| [EPI1954421](https://platform.epicov.org/epi3/start/EPI/1954421) | Germany | 2020-Nov-09 | [EPI_ISL_5061617](https://platform.epicov.org/epi3/start/EPI_ISL/5061617) | A/chicken/Germany-MV/AI02431/2020 | Landesamt für Landwirtschaft, Lebensmittelsicherheit und Fischerei (LALLF) | Friedrich-Loeffler-Institut |  |
| [EPI1943855](https://platform.epicov.org/epi3/start/EPI/1943855) | Germany | 2021-Mar-01 | [EPI_ISL_5145613](https://platform.epicov.org/epi3/start/EPI_ISL/5145613) | A/chicken/Germany-BY/AI02060/2021 | Bayrisches Landesamt für Gesundheit und Lebensmittelsicherheit (LGL) | Friedrich-Loeffler-Institut |  |
| [EPI1943851](https://platform.epicov.org/epi3/start/EPI/1943851) | Germany | 2021-Mar-23 | [EPI_ISL_5145858](https://platform.epicov.org/epi3/start/EPI_ISL/5145858) | A/chicken/Germany-TH/AI03512/2021 | Thüringer Landesamt für Verbraucherschutz (TLAV) | Friedrich-Loeffler-Institut |  |
| [EPI1943871](https://platform.epicov.org/epi3/start/EPI/1943871) | Germany | 2021-Mar-22 | [EPI_ISL_5143626](https://platform.epicov.org/epi3/start/EPI_ISL/5143626) | A/chicken/Germany-TH/AI03193/2021 | Thüringer Landesamt für Verbraucherschutz (TLAV) | Friedrich-Loeffler-Institut |  |
| [EPI1943876](https://platform.epicov.org/epi3/start/EPI/1943876) | Germany | 2021-Mar-24 | [EPI_ISL_5143583](https://platform.epicov.org/epi3/start/EPI_ISL/5143583) | A/chicken/Germany-TH/AI03513/2021 | Thüringer Landesamt für Verbraucherschutz (TLAV) | Friedrich-Loeffler-Institut |  |
| [EPI1943872](https://platform.epicov.org/epi3/start/EPI/1943872) | Germany | 2021-Mar-24 | [EPI_ISL_5143587](https://platform.epicov.org/epi3/start/EPI_ISL/5143587) | A/chicken/Germany-SN/AI03502/2021 | Landesuntersuchungsanstalt für das Gesundheits- und Veterinärwesen Sachsen | Friedrich-Loeffler-Institut |  |
| [EPI1943873](https://platform.epicov.org/epi3/start/EPI/1943873) | Germany | 2021-Mar-24 | [EPI_ISL_5143586](https://platform.epicov.org/epi3/start/EPI_ISL/5143586) | A/chicken/Germany-SN/AI03496/2021 | Landesuntersuchungsanstalt für das Gesundheits- und Veterinärwesen Sachsen | Friedrich-Loeffler-Institut |  |
| [EPI1944162](https://platform.epicov.org/epi3/start/EPI/1944162) | Germany | 2021-Mar-05 | [EPI_ISL_5116093](https://platform.epicov.org/epi3/start/EPI_ISL/5116093) | A/chicken/Germany-SN/AI02353/2021 | Landesuntersuchungsanstalt für das Gesundheits- und Veterinärwesen Sachsen | Friedrich-Loeffler-Institut |  |
| [EPI1943877](https://platform.epicov.org/epi3/start/EPI/1943877) | Germany | 2021-Mar-09 | [EPI_ISL_5143554](https://platform.epicov.org/epi3/start/EPI_ISL/5143554) | A/chicken/Germany-NI/AI02412/2021 | Lebensmittel- und Veterinärinstitut Oldenburg - Standort Veterinärinstitut | Friedrich-Loeffler-Institut |  |
| [EPI1943883](https://platform.epicov.org/epi3/start/EPI/1943883) | Germany | 2021-Mar-10 | [EPI_ISL_5142894](https://platform.epicov.org/epi3/start/EPI_ISL/5142894) | A/chicken/Germany-NI/AI02543/2021 | Lebensmittel- und Veterinärinstitut Oldenburg - Standort Veterinärinstitut | Friedrich-Loeffler-Institut |  |
| [EPI1944024](https://platform.epicov.org/epi3/start/EPI/1944024) | Germany | 2021-Mar-15 | [EPI_ISL_5135087](https://platform.epicov.org/epi3/start/EPI_ISL/5135087) | A/chicken/Germany-NI/AI02942/2021 | Lebensmittel- und Veterinärinstitut Oldenburg - Standort Veterinärinstitut | Friedrich-Loeffler-Institut |  |
| [EPI1944147](https://platform.epicov.org/epi3/start/EPI/1944147) | Germany | 2021-Mar-13 | [EPI_ISL_5133724](https://platform.epicov.org/epi3/start/EPI_ISL/5133724) | A/chicken/Germany-NI/AI02954/2021 | Lebensmittel- und Veterinärinstitut Oldenburg - Standort Veterinärinstitut | Friedrich-Loeffler-Institut |  |
| [EPI1944167](https://platform.epicov.org/epi3/start/EPI/1944167) | Germany | 2021-Mar-06 | [EPI_ISL_5115970](https://platform.epicov.org/epi3/start/EPI_ISL/5115970) | A/chicken/Germany-NI/AI02328/2021 | Lebensmittel- und Veterinärinstitut Oldenburg - Standort Veterinärinstitut | Friedrich-Loeffler-Institut |  |
| [EPI1944193](https://platform.epicov.org/epi3/start/EPI/1944193) | Germany | 2021-Feb-28 | [EPI_ISL_5099476](https://platform.epicov.org/epi3/start/EPI_ISL/5099476) | A/chicken/Germany-NI/AI01815/2021 | Lebensmittel- und Veterinärinstitut Oldenburg - Standort Veterinärinstitut | Friedrich-Loeffler-Institut |  |
| [EPI1944199](https://platform.epicov.org/epi3/start/EPI/1944199) | Germany | 2021-Feb-23 | [EPI_ISL_5099451](https://platform.epicov.org/epi3/start/EPI_ISL/5099451) | A/chicken/Germany-NI/AI01599/2021 | Lebensmittel- und Veterinärinstitut Oldenburg - Standort Veterinärinstitut | Friedrich-Loeffler-Institut |  |
| [EPI1944214](https://platform.epicov.org/epi3/start/EPI/1944214) | Germany | 2021-Jan-22 | [EPI_ISL_5098143](https://platform.epicov.org/epi3/start/EPI_ISL/5098143) | A/chicken/Germany-NI/AI00887/2021 | Lebensmittel- und Veterinärinstitut Oldenburg - Standort Veterinärinstitut | Friedrich-Loeffler-Institut |  |
| [EPI1954389](https://platform.epicov.org/epi3/start/EPI/1954389) | Germany | 2021-Jan-12 | [EPI_ISL_5095555](https://platform.epicov.org/epi3/start/EPI_ISL/5095555) | A/chicken/Germany-NI/AI00547/2021 | Lebensmittel- und Veterinärinstitut Oldenburg - Standort Veterinärinstitut | Friedrich-Loeffler-Institut |  |
| [EPI1943868](https://platform.epicov.org/epi3/start/EPI/1943868) | Germany | 2021-Mar-21 | [EPI_ISL_5143995](https://platform.epicov.org/epi3/start/EPI_ISL/5143995) | A/domestic duck/Germany-ST/AI03183/2021 | Landesamt für Verbraucherschutz Sachsen-Anhalt | Friedrich-Loeffler-Institut |  |
| [EPI1943885](https://platform.epicov.org/epi3/start/EPI/1943885) | Germany | 2021-Mar-16 | [EPI_ISL_5142488](https://platform.epicov.org/epi3/start/EPI_ISL/5142488) | A/chicken/Germany-ST/AI02967/2021 | Landesamt für Verbraucherschutz Sachsen-Anhalt | Friedrich-Loeffler-Institut |  |
| [EPI1944149](https://platform.epicov.org/epi3/start/EPI/1944149) | Germany | 2021-Mar-11 | [EPI_ISL_5123847](https://platform.epicov.org/epi3/start/EPI_ISL/5123847) | A/chicken/Germany-SH/AI02562/2021 | Landeslabor Schleswig-Holstein | Friedrich-Loeffler-Institut |  |
| [EPI1944170](https://platform.epicov.org/epi3/start/EPI/1944170) | Germany | 2021-Mar-05 | [EPI_ISL_5115967](https://platform.epicov.org/epi3/start/EPI_ISL/5115967) | A/chicken/Germany-SH/AI02312/2021 | Landeslabor Schleswig-Holstein | Friedrich-Loeffler-Institut |  |
| [EPI1943875](https://platform.epicov.org/epi3/start/EPI/1943875) | Germany | 2021-Mar-24 | [EPI_ISL_5143584](https://platform.epicov.org/epi3/start/EPI_ISL/5143584) | A/chicken/Germany-BY/AI03544/2021 | Bayrisches Landesamt für Gesundheit und Lebensmittelsicherheit (LGL) | Friedrich-Loeffler-Institut |  |
| [EPI1944185](https://platform.epicov.org/epi3/start/EPI/1944185) | Germany | 2021-Mar-02 | [EPI_ISL_5102136](https://platform.epicov.org/epi3/start/EPI_ISL/5102136) | A/chicken/Germany-BY/AI02066/2021 | Bayrisches Landesamt für Gesundheit und Lebensmittelsicherheit (LGL) | Friedrich-Loeffler-Institut |  |
| [EPI1944186](https://platform.epicov.org/epi3/start/EPI/1944186) | Germany | 2021-Mar-01 | [EPI_ISL_5102132](https://platform.epicov.org/epi3/start/EPI_ISL/5102132) | A/chicken/Germany-BY/AI02064/2021 | Bayrisches Landesamt für Gesundheit und Lebensmittelsicherheit (LGL) | Friedrich-Loeffler-Institut |  |
| [EPI1944197](https://platform.epicov.org/epi3/start/EPI/1944197) | Germany | 2021-Feb-24 | [EPI_ISL_5099462](https://platform.epicov.org/epi3/start/EPI_ISL/5099462) | A/chicken/Germany-BY/AI01617/2021 | Bayrisches Landesamt für Gesundheit und Lebensmittelsicherheit (LGL) | Friedrich-Loeffler-Institut |  |
| [EPI1944203](https://platform.epicov.org/epi3/start/EPI/1944203) | Germany | 2021-Feb-07 | [EPI_ISL_5099367](https://platform.epicov.org/epi3/start/EPI_ISL/5099367) | A/chicken/Germany-BY/AI01355/2021 | Bayrisches Landesamt für Gesundheit und Lebensmittelsicherheit (LGL) | Friedrich-Loeffler-Institut |  |
| [EPI2042034](https://platform.epicov.org/epi3/start/EPI/2042034) | Romania | 2022-Mar-26 | [EPI_ISL_12754534](https://platform.epicov.org/epi3/start/EPI_ISL/12754534) | A/laying_hen/Romania/11562_22VIR4106-4/2022 | Institute for Diagnosis & Animal Health (IDAH) | Istituto Zooprofilattico Sperimentale Delle Venezie | Barbuceanu, F; Onita, I.; Neicut, A.; Motiu, R.; Burlacu, R.; Zecchin, B.; Barbierato, G.; Fusaro, A.; Schivo, A.; Salviato, A.; Palumbo, E.; Giussani, E.; Monne, I.; Terregino, C. |
| [EPI2042013](https://platform.epicov.org/epi3/start/EPI/2042013) | Romania | 2022-Mar-18 | [EPI_ISL_12754531](https://platform.epicov.org/epi3/start/EPI_ISL/12754531) | A/laying_hen/Romania/11343_22VIR4106-1/2022 | Institute for Diagnosis & Animal Health (IDAH) | Istituto Zooprofilattico Sperimentale Delle Venezie | Barbuceanu, F; Onita, I.; Neicut, A.; Motiu, R.; Burlacu, R.; Zecchin, B.; Barbierato, G.; Fusaro, A.; Schivo, A.; Salviato, A.; Palumbo, E.; Giussani, E.; Monne, I.; Terregino, C. |
| [EPI1877870](https://platform.epicov.org/epi3/start/EPI/1877870) | Romania | 2021-May-05 | [EPI_ISL_2681044](https://platform.epicov.org/epi3/start/EPI_ISL/2681044) | A/chicken/Romania/12448_21VIR3734-3/2021 | Institute for Diagnosis & Animal Health (IDAH) | Istituto Zooprofilattico Sperimentale Delle Venezie | Onita, I.; Neicut, A.; Raluca, B.; Razvan, M.; Florica, B.; Zecchin, B.; Fusaro, A.; Giussani, E.; Schivo, A.; Salviato, A.; Monne, I.; Terregino, C. |
| [EPI1858204](https://platform.epicov.org/epi3/start/EPI/1858204) | Slovakia | 2021-Jan-22 | [EPI_ISL_1665250](https://platform.epicov.org/epi3/start/EPI_ISL/1665250) | A/chicken/Slovakia/Pah10_21VIR1086-5/2021 | Istituto Zooprofilattico Sperimentale delle Venezie, EU/OIE/Reference Laboratory and FAO Reference Centre for AI and ND | Istituto Zooprofilattico Sperimentale Delle Venezie | Dirb?kov?, Z.; Tin?k, M.; Zecchin, B.; Fusaro, A.; Pastori, A.; Schivo, A.; Salviato, A.; Monne, I.; Terregino, C. |
| [EPI1858196](https://platform.epicov.org/epi3/start/EPI/1858196) | Romania | 2021-Feb-23 | [EPI_ISL_1665249](https://platform.epicov.org/epi3/start/EPI_ISL/1665249) | A/chicken/Romania/10101_21VIR2044-1/2021 | Istituto Zooprofilattico Sperimentale delle Venezie, EU/OIE/Reference Laboratory and FAO Reference Centre for AI and ND | Istituto Zooprofilattico Sperimentale Delle Venezie | Onita, I.; Neicut, A.; Raluca, B.; Razvan, M.; Florica, B.; Zecchin, B.; Fusaro, A.; Pastori, A.; Schivo, A.; Salviato, A.; Monne, I.; Terregino, C. |
| [EPI1944188](https://platform.epicov.org/epi3/start/EPI/1944188) | Germany | 2021-Mar-01 | [EPI_ISL_5102033](https://platform.epicov.org/epi3/start/EPI_ISL/5102033) | A/domestic duck/Germany-NW/AI02049/2021 | Chemisches und Veterinäruntersuchungsamt Westfalen-Arnsberg (CVUA-Westfalen) | Friedrich-Loeffler-Institut |  |
| [EPI2009935](https://platform.epicov.org/epi3/start/EPI/2009935) | Germany | 2021-Nov-02 | [EPI_ISL_11725869](https://platform.epicov.org/epi3/start/EPI_ISL/11725869) | A/domestic duck/Germany-BB/AI06239/2021 | Landeslabor Berlin-Brandenburg | Friedrich-Loeffler-Institut |  |
| [EPI1944150](https://platform.epicov.org/epi3/start/EPI/1944150) | Germany | 2021-Mar-11 | [EPI_ISL_5123590](https://platform.epicov.org/epi3/start/EPI_ISL/5123590) | A/domestic duck/Germany-BB/AI02599/2021 | Landeslabor Berlin-Brandenburg | Friedrich-Loeffler-Institut |  |
| [EPI1944191](https://platform.epicov.org/epi3/start/EPI/1944191) | Germany | 2021-Feb-17 | [EPI_ISL_5099628](https://platform.epicov.org/epi3/start/EPI_ISL/5099628) | A/domestic duck/Germany-BB/AI01443/2021 | Landeslabor Berlin-Brandenburg | Friedrich-Loeffler-Institut |  |
| [EPI1944192](https://platform.epicov.org/epi3/start/EPI/1944192) | Germany | 2021-Feb-17 | [EPI_ISL_5099478](https://platform.epicov.org/epi3/start/EPI_ISL/5099478) | A/domestic duck/Germany-BB/AI01435/2021 | Landeslabor Berlin-Brandenburg | Friedrich-Loeffler-Institut |  |
| [EPI1944204](https://platform.epicov.org/epi3/start/EPI/1944204) | Germany | 2021-Feb-17 | [EPI_ISL_5099356](https://platform.epicov.org/epi3/start/EPI_ISL/5099356) | A/domestic duck/Germany-BB/AI01444/2021 | Landeslabor Berlin-Brandenburg | Friedrich-Loeffler-Institut |  |
| [EPI1944205](https://platform.epicov.org/epi3/start/EPI/1944205) | Germany | 2021-Feb-17 | [EPI_ISL_5098160](https://platform.epicov.org/epi3/start/EPI_ISL/5098160) | A/domestic duck/Germany-BB/AI01437/2021 | Landeslabor Berlin-Brandenburg | Friedrich-Loeffler-Institut |  |
| [EPI1944206](https://platform.epicov.org/epi3/start/EPI/1944206) | Germany | 2021-Feb-16 | [EPI_ISL_5098159](https://platform.epicov.org/epi3/start/EPI_ISL/5098159) | A/domestic duck/Germany-BB/AI01423/2021 | Landeslabor Berlin-Brandenburg | Friedrich-Loeffler-Institut |  |
| [EPI1945163](https://platform.epicov.org/epi3/start/EPI/1945163) | Germany | 2021-Oct-17 | [EPI_ISL_7753230](https://platform.epicov.org/epi3/start/EPI_ISL/7753230) | A/mallard/Germany-NI/AI06010/2021 | Lebensmittel- und Veterinärinstitut Oldenburg - Standort Veterinärinstitut | Friedrich-Loeffler-Institut |  |
| [EPI1943865](https://platform.epicov.org/epi3/start/EPI/1943865) | Germany | 2021-Mar-18 | [EPI_ISL_5144368](https://platform.epicov.org/epi3/start/EPI_ISL/5144368) | A/domestic duck/Germany-NI/AI03088/2021 | Lebensmittel- und Veterinärinstitut Oldenburg - Standort Veterinärinstitut | Friedrich-Loeffler-Institut |  |
| [EPI1943890](https://platform.epicov.org/epi3/start/EPI/1943890) | Germany | 2021-Mar-14 | [EPI_ISL_5141340](https://platform.epicov.org/epi3/start/EPI_ISL/5141340) | A/domestic duck/Germany-NI/AI02660/2021 | Lebensmittel- und Veterinärinstitut Oldenburg - Standort Veterinärinstitut | Friedrich-Loeffler-Institut |  |
| [EPI1944153](https://platform.epicov.org/epi3/start/EPI/1944153) | Germany | 2021-Mar-19 | [EPI_ISL_5123579](https://platform.epicov.org/epi3/start/EPI_ISL/5123579) | A/domestic duck/Germany-NI/AI03099/2021 | Lebensmittel- und Veterinärinstitut Oldenburg - Standort Veterinärinstitut | Friedrich-Loeffler-Institut |  |
| [EPI1954372](https://platform.epicov.org/epi3/start/EPI/1954372) | Germany | 2020-Dec-16 | [EPI_ISL_5098134](https://platform.epicov.org/epi3/start/EPI_ISL/5098134) | A/wild duck/Germany-NI/AI03479/2020 | Lebensmittel- und Veterinärinstitut Oldenburg - Standort Veterinärinstitut | Friedrich-Loeffler-Institut |  |
| [EPI1954379](https://platform.epicov.org/epi3/start/EPI/1954379) | Germany | 2021-Jan-19 | [EPI_ISL_5096105](https://platform.epicov.org/epi3/start/EPI_ISL/5096105) | A/domestic duck/Germany-NI/AI00646/2021 | Lebensmittel- und Veterinärinstitut Oldenburg - Standort Veterinärinstitut | Friedrich-Loeffler-Institut |  |
| [EPI1954399](https://platform.epicov.org/epi3/start/EPI/1954399) | Germany | 2021-Jan-04 | [EPI_ISL_5067957](https://platform.epicov.org/epi3/start/EPI_ISL/5067957) | A/domestic duck/Germany-NI/AI00079/2021 | Lebensmittel- und Veterinärinstitut Oldenburg - Standort Veterinärinstitut | Friedrich-Loeffler-Institut |  |
| [EPI1945092](https://platform.epicov.org/epi3/start/EPI/1945092) | Germany | 2021-Oct-14 | [EPI_ISL_7748188](https://platform.epicov.org/epi3/start/EPI_ISL/7748188) | A/Eurasian wigeon/Germany-SH/AI05950/2021 | Landeslabor Schleswig-Holstein | Friedrich-Loeffler-Institut |  |
| [EPI1945093](https://platform.epicov.org/epi3/start/EPI/1945093) | Germany | 2021-Oct-14 | [EPI_ISL_7748188](https://platform.epicov.org/epi3/start/EPI_ISL/7748188) | A/Eurasian wigeon/Germany-SH/AI05950/2021 | Landeslabor Schleswig-Holstein | Friedrich-Loeffler-Institut |  |
| [EPI1943842](https://platform.epicov.org/epi3/start/EPI/1943842) | Germany | 2021-Oct-14 | [EPI_ISL_5403566](https://platform.epicov.org/epi3/start/EPI_ISL/5403566) | A/Eurasian wigeon/Germany-SH/AI05948/2021 | Landeslabor Schleswig-Holstein | Friedrich-Loeffler-Institut |  |
| [EPI1919622](https://platform.epicov.org/epi3/start/EPI/1919622) | Germany | 2020-Nov-02 | [EPI_ISL_5058262](https://platform.epicov.org/epi3/start/EPI_ISL/5058262) | A/wild duck/Germany-SH/AI02189/2020 | Landeslabor Schleswig-Holstein | Friedrich-Loeffler-Institut |  |
| [EPI1919601](https://platform.epicov.org/epi3/start/EPI/1919601) | Germany | 2020-Nov-01 | [EPI_ISL_5057876](https://platform.epicov.org/epi3/start/EPI_ISL/5057876) | A/Eurasian wigeon/Germany-SH/AI02179/2020 | Landeslabor Schleswig-Holstein | Friedrich-Loeffler-Institut |  |
| [EPI1919593](https://platform.epicov.org/epi3/start/EPI/1919593) | Germany | 2020-Oct-30 | [EPI_ISL_5057875](https://platform.epicov.org/epi3/start/EPI_ISL/5057875) | A/Eurasian wigeon/Germany-SH/AI02176/2020 | Landeslabor Schleswig-Holstein | Friedrich-Loeffler-Institut |  |
| [EPI1860103](https://platform.epicov.org/epi3/start/EPI/1860103) | Romania | 2021-Jan-13 | [EPI_ISL_2234816](https://platform.epicov.org/epi3/start/EPI_ISL/2234816) | A/duck/Romania/10205-t4_21VIR2593-3/2021 | Istituto Zooprofilattico Sperimentale delle Venezie, EU/OIE/Reference Laboratory and FAO Reference Centre for AI and ND | Istituto Zooprofilattico Sperimentale Delle Venezie | Onita, I.; Neicut, A.; Raluca, B.; Razvan, M.; Florica, B.; Zecchin, B.; Fusaro, A.; Giussani, E.; Schivo, A.; Salviato, A.; Monne, I.; Terregino, C. |
| [EPI1860095](https://platform.epicov.org/epi3/start/EPI/1860095) | Romania | 2021-Jan-13 | [EPI_ISL_2234815](https://platform.epicov.org/epi3/start/EPI_ISL/2234815) | A/duck/Romania/10202_21VIR2593-31/2021 | Istituto Zooprofilattico Sperimentale delle Venezie, EU/OIE/Reference Laboratory and FAO Reference Centre for AI and ND | Istituto Zooprofilattico Sperimentale Delle Venezie | Onita, I.; Neicut, A.; Raluca, B.; Razvan, M.; Florica, B.; Zecchin, B.; Fusaro, A.; Giussani, E.; Schivo, A.; Salviato, A.; Monne, I.; Terregino, C. |
| [EPI1858244](https://platform.epicov.org/epi3/start/EPI/1858244) | Slovakia | 2021-Jan-08 | [EPI_ISL_1665256](https://platform.epicov.org/epi3/start/EPI_ISL/1665256) | A/muscovy_duck/Slovakia/Pah1_21VIR1086-1/2021 | Istituto Zooprofilattico Sperimentale delle Venezie, EU/OIE/Reference Laboratory and FAO Reference Centre for AI and ND | Istituto Zooprofilattico Sperimentale Delle Venezie | Dirb?kov?, Z.; Tin?k, M.; Zecchin, B.; Fusaro, A.; Pastori, A.; Schivo, A.; Salviato, A.; Monne, I.; Terregino, C. |
| [EPI1858228](https://platform.epicov.org/epi3/start/EPI/1858228) | Romania | 2021-Jan-13 | [EPI_ISL_1665254](https://platform.epicov.org/epi3/start/EPI_ISL/1665254) | A/duck/Romania/10206_21VIR849-4/2021 | Istituto Zooprofilattico Sperimentale delle Venezie, EU/OIE/Reference Laboratory and FAO Reference Centre for AI and ND | Istituto Zooprofilattico Sperimentale Delle Venezie | Onita, I.; Neicut, A.; Raluca, B.; Razvan, M.; Florica, B.; Zecchin, B.; Fusaro, A.; Pastori, A.; Schivo, A.; Salviato, A.; Monne, I.; Terregino, C. |
| [EPI1945179](https://platform.epicov.org/epi3/start/EPI/1945179) | Germany | 2021-Oct-20 | [EPI_ISL_7753272](https://platform.epicov.org/epi3/start/EPI_ISL/7753272) | A/white-tailed eagle/Germany-MV/AI05975/2021 | Landesamt für Landwirtschaft, Lebensmittelsicherheit und Fischerei (LALLF) | Friedrich-Loeffler-Institut |  |
| [EPI2244218](https://platform.epicov.org/epi3/start/EPI/2244218) | Denmark | 2022-Aug-30 | [EPI_ISL_16115054](https://platform.epicov.org/epi3/start/EPI_ISL/16115054) | A/common_buzzard/Denmark/08287-1.01/2022 | Statens Serum Institute | Statens Serum Institute | Hjulsager,Charlotte; Liang,Yuan |
| [EPI2011656](https://platform.epicov.org/epi3/start/EPI/2011656) | Denmark | 2021-Oct-25 | [EPI_ISL_11798571](https://platform.epicov.org/epi3/start/EPI_ISL/11798571) | A/common_buzzard/Denmark/24271-1.02/2021-10-25 | Statens Serumm Institute | Statens Serum Institute | Charlotte Hjulsager, Yuan Liang |
| [EPI1883037](https://platform.epicov.org/epi3/start/EPI/1883037) | Denmark | 2020-Nov-06 | [EPI_ISL_984691](https://platform.epicov.org/epi3/start/EPI_ISL/984691) | A/common buzzard/Denmark/14600-1/2020 | Statens Serumm Institute | Statens Serum Institute | Yuan Liang, Charlotte Hjulsager |
| [EPI1988861](https://platform.epicov.org/epi3/start/EPI/1988861) | Germany | 2022-Feb-11 | [EPI_ISL_10497306](https://platform.epicov.org/epi3/start/EPI_ISL/10497306) | A/buzzard/Germany-BB/AI01212/2022 | Landeslabor Berlin-Brandenburg | Friedrich-Loeffler-Institut |  |
| [EPI1811564](https://platform.epicov.org/epi3/start/EPI/1811564) | Germany | 2020-Oct-29 | [EPI_ISL_614399](https://platform.epicov.org/epi3/start/EPI_ISL/614399) | A/buzzard/Germany-MV/AI02166/2020 | Landesamt für Landwirtschaft, Lebensmittelsicherheit und Fischerei (LALLF) | Friedrich-Loeffler-Institut |  |
| [EPI1954434](https://platform.epicov.org/epi3/start/EPI/1954434) | Germany | 2021-Apr-28 | [EPI_ISL_5146696](https://platform.epicov.org/epi3/start/EPI_ISL/5146696) | A/buzzard/Germany-NI/AI04429/2021 | Lebensmittel- und Veterinärinstitut Oldenburg - Standort Veterinärinstitut | Friedrich-Loeffler-Institut |  |
| [EPI2009967](https://platform.epicov.org/epi3/start/EPI/2009967) | Germany | 2021-Nov-09 | [EPI_ISL_11725994](https://platform.epicov.org/epi3/start/EPI_ISL/11725994) | A/buzzard/Germany-SH/AI07099/2021 | Landeslabor Schleswig-Holstein | Friedrich-Loeffler-Institut |  |
| [EPI2244162](https://platform.epicov.org/epi3/start/EPI/2244162) | Denmark | 2022-Jun-11 | [EPI_ISL_16113366](https://platform.epicov.org/epi3/start/EPI_ISL/16113366) | A/white-tailed_eagle/Denmark/05716-1.04/2022 | Statens Serum Institute | Statens Serum Institute | Hjulsager,Charlotte; Liang,Yuan |
| [EPI1883984](https://platform.epicov.org/epi3/start/EPI/1883984) | Hungary | 2021-Mar-08 | [EPI_ISL_3135926](https://platform.epicov.org/epi3/start/EPI_ISL/3135926) | A/eagle/Hungary/8569/2021 (H5N5) | National Food Chain Safety Office Veterinary Diagnostic Directorate Laboratory for Molecular Biology | National Food Chain Safety Office, Hungary | Katalin,Szentpáli-Gavallér;Ádám,Bálint;Krisztina,Ursu;Péter,Malik |
| [EPI1944184](https://platform.epicov.org/epi3/start/EPI/1944184) | Germany | 2020-Oct-29 | [EPI_ISL_5102449](https://platform.epicov.org/epi3/start/EPI_ISL/5102449) | A/white-tailed eagle/Germany-SH/AI02170/2020 | Landeslabor Schleswig-Holstein | Friedrich-Loeffler-Institut |  |
| [EPI1918889](https://platform.epicov.org/epi3/start/EPI/1918889) | Germany | 2021-Aug-15 | [EPI_ISL_4804850](https://platform.epicov.org/epi3/start/EPI_ISL/4804850) | A/seal/Germany-SH/AI05373/2021 | Landeslabor Schleswig-Holstein | Friedrich-Loeffler-Institut |  |
| [EPI1918903](https://platform.epicov.org/epi3/start/EPI/1918903) | Germany | 2021-Aug-19 | [EPI_ISL_4805936](https://platform.epicov.org/epi3/start/EPI_ISL/4805936) | A/seal/Germany-SH/AI05379/2021 | Tierärztliche Hochschule Hannover | Friedrich-Loeffler-Institut |  |
| [EPI1918893](https://platform.epicov.org/epi3/start/EPI/1918893) | Germany | 2021-Aug-18 | [EPI_ISL_4805852](https://platform.epicov.org/epi3/start/EPI_ISL/4805852) | A/seal/Germany-SH/AI05377/2021 | Tierärztliche Hochschule Hannover | Friedrich-Loeffler-Institut |  |
| [EPI1986624](https://platform.epicov.org/epi3/start/EPI/1986624) | Denmark | 2021-Sep-15 | [EPI_ISL_10053635](https://platform.epicov.org/epi3/start/EPI_ISL/10053635) | A/harbour_seal/Denmark/521-2/2021-09-15(H5N8) | National Veterinary Institute DTU | Statens Serum Institute | Hjulsager, Charlotte |
| [EPI2244178](https://platform.epicov.org/epi3/start/EPI/2244178) | Denmark | 2022-Jun-08 | [EPI_ISL_16113231](https://platform.epicov.org/epi3/start/EPI_ISL/16113231) | A/tawny_owl/Denmark/05372-1.01/2022 | Statens Serumm Institute | Statens Serum Institute | Hjulsager,Charlotte; Liang,Yuan |
| [EPI2244170](https://platform.epicov.org/epi3/start/EPI/2244170) | Denmark | 2022-Jun-08 | [EPI_ISL_16113242](https://platform.epicov.org/epi3/start/EPI_ISL/16113242) | A/tawny_owl/Denmark/05373-1.01/2022 | Statens Serum Institute | Statens Serum Institute | Hjulsager,Charlotte; Liang,Yuan |
| [EPI2042027](https://platform.epicov.org/epi3/start/EPI/2042027) | Romania | 2022-Mar-17 | [EPI_ISL_12754533](https://platform.epicov.org/epi3/start/EPI_ISL/12754533) | A/pelican/Romania/11334_22VIR4106-3/2022 | Institute for Diagnosis & Animal Health (IDAH) | Istituto Zooprofilattico Sperimentale Delle Venezie | Barbuceanu, F; Onita, I.; Neicut, A.; Motiu, R.; Burlacu, R.; Zecchin, B.; Barbierato, G.; Fusaro, A.; Schivo, A.; Salviato, A.; Palumbo, E.; Giussani, E.; Monne, I.; Terregino, C. |
| [EPI2042020](https://platform.epicov.org/epi3/start/EPI/2042020) | Romania | 2022-Mar-17 | [EPI_ISL_12754532](https://platform.epicov.org/epi3/start/EPI_ISL/12754532) | A/pelican/Romania/11335_22VIR4106-2/2022 | Institute for Diagnosis & Animal Health (IDAH) | Istituto Zooprofilattico Sperimentale Delle Venezie | Barbuceanu, F; Onita, I.; Neicut, A.; Motiu, R.; Burlacu, R.; Zecchin, B.; Barbierato, G.; Fusaro, A.; Schivo, A.; Salviato, A.; Palumbo, E.; Giussani, E.; Monne, I.; Terregino, C. |
| [EPI1883629](https://platform.epicov.org/epi3/start/EPI/1883629) | Romania | 2021-Apr-08 | [EPI_ISL_3102082](https://platform.epicov.org/epi3/start/EPI_ISL/3102082) | A/mute_swan/Romania/11981-2_21VIR3163-6/2021 | Istituto Zooprofilattico Sperimentale delle Venezie, EU/OIE/Reference Laboratory and FAO Reference Centre for AI and ND | Istituto Zooprofilattico Sperimentale Delle Venezie | Onita, I.; Neicut, A.; Raluca, B.; Razvan, M.; Florica, B.; Zecchin, B.; Fusaro, A.; Giussani, E.; Schivo, A.; Salviato, A.; Monne, I.; Terregino, C. |
| [EPI1883621](https://platform.epicov.org/epi3/start/EPI/1883621) | Romania | 2021-Apr-08 | [EPI_ISL_3102081](https://platform.epicov.org/epi3/start/EPI_ISL/3102081) | A/mute_swan/Romania/11981-1_21VIR3163-5/2021 | Istituto Zooprofilattico Sperimentale delle Venezie, EU/OIE/Reference Laboratory and FAO Reference Centre for AI and ND | Istituto Zooprofilattico Sperimentale Delle Venezie | Onita, I.; Neicut, A.; Raluca, B.; Razvan, M.; Florica, B.; Zecchin, B.; Fusaro, A.; Giussani, E.; Schivo, A.; Salviato, A.; Monne, I.; Terregino, C. |
| [EPI1860135](https://platform.epicov.org/epi3/start/EPI/1860135) | Romania | 2021-Jan-22 | [EPI_ISL_2234820](https://platform.epicov.org/epi3/start/EPI_ISL/2234820) | A/hawk/Romania/10363_21VIR2593-11/2021 | Istituto Zooprofilattico Sperimentale delle Venezie, EU/OIE/Reference Laboratory and FAO Reference Centre for AI and ND | Istituto Zooprofilattico Sperimentale Delle Venezie | Onita, I.; Neicut, A.; Raluca, B.; Razvan, M.; Florica, B.; Zecchin, B.; Fusaro, A.; Giussani, E.; Schivo, A.; Salviato, A.; Monne, I.; Terregino, C. |
| [EPI1858372](https://platform.epicov.org/epi3/start/EPI/1858372) | Romania | 2021-Jan-19 | [EPI_ISL_1665274](https://platform.epicov.org/epi3/start/EPI_ISL/1665274) | A/house_sparrow/Romania/10327_21VIR849-5/2021 | Istituto Zooprofilattico Sperimentale delle Venezie, EU/OIE/Reference Laboratory and FAO Reference Centre for AI and ND | Istituto Zooprofilattico Sperimentale Delle Venezie | Onita, I.; Neicut, A.; Raluca, B.; Razvan, M.; Florica, B.; Zecchin, B.; Fusaro, A.; Pastori, A.; Schivo, A.; Salviato, A.; Monne, I.; Terregino, C. |
| [EPI2415769](https://platform.epicov.org/epi3/start/EPI/2415769) | Denmark | 2022-Oct-20 | [EPI_ISL_16997727](https://platform.epicov.org/epi3/start/EPI_ISL/16997727) | A/mallard/Denmark/09179-5/2022 | Statens Serumm Institute | Statens Serum Institute | Hjulsager,Charlotte |
| [EPI1882954](https://platform.epicov.org/epi3/start/EPI/1882954) | Denmark | 2020-Oct-26 | [EPI_ISL_3031133](https://platform.epicov.org/epi3/start/EPI_ISL/3031133) | A_mallard_Denmark_12946-11_2020-10-26 | Statens Serumm Institute | Statens Serum Institute | Hjulsager, Charlotte |
| [EPI1954382](https://platform.epicov.org/epi3/start/EPI/1954382) | Germany | 2021-Jan-20 | [EPI_ISL_5096070](https://platform.epicov.org/epi3/start/EPI_ISL/5096070) | A/mallard/Germany-MV/AI00639/2021 | Friedrich-Loeffler-Institut | Friedrich-Loeffler-Institut |  |
| [EPI2015053](https://platform.epicov.org/epi3/start/EPI/2015053) | Denmark | 2021-Oct-24 | [EPI_ISL_11798574](https://platform.epicov.org/epi3/start/EPI_ISL/11798574) | A/Eurasian_wigeon/Denmark/24279-1/2021-10-24 | Statens Serumm Institute | Statens Serum Institute | Charlotte Hjulsager, Yuan Liang |
| [EPI2015085](https://platform.epicov.org/epi3/start/EPI/2015085) | Denmark | 2021-Nov-01 | [EPI_ISL_11798579](https://platform.epicov.org/epi3/start/EPI_ISL/11798579) | A/greylag_goose/Denmark/24343-1.02/2021-11-01 | Statens Serumm Institute | Statens Serum Institute | Charlotte Hjulsager, Yuan Liang |
| [EPI2015077](https://platform.epicov.org/epi3/start/EPI/2015077) | Denmark | 2021-Oct-27 | [EPI_ISL_11798578](https://platform.epicov.org/epi3/start/EPI_ISL/11798578) | A/greylag_goose/Denmark/24309-1.01/2021-10-27 | Statens Serumm Institute | Statens Serum Institute | Charlotte Hjulsager, Yuan Liang |
| [EPI1883062](https://platform.epicov.org/epi3/start/EPI/1883062) | Denmark | 2020-Nov-09 | [EPI_ISL_984694](https://platform.epicov.org/epi3/start/EPI_ISL/984694) | A/graylag goose/Denmark/14535-1/2020 | Statens Serumm Institute | Statens Serum Institute | Yuan Liang, Charlotte Hjulsager |
| [EPI1954424](https://platform.epicov.org/epi3/start/EPI/1954424) | Germany | 2020-Nov-03 | [EPI_ISL_5061390](https://platform.epicov.org/epi3/start/EPI_ISL/5061390) | A/greylag goose/Germany-SH/AI02207/2020 | Landeslabor Schleswig-Holstein | Friedrich-Loeffler-Institut |  |
| [EPI2131905](https://platform.epicov.org/epi3/start/EPI/2131905) | Germany | 2022-May-06 | [EPI_ISL_14571449](https://platform.epicov.org/epi3/start/EPI_ISL/14571449) | A/great cormorant/Germany-MV/AI02774/2022 | Landesamt für Landwirtschaft, Lebensmittelsicherheit und Fischerei (LALLF) | Friedrich-Loeffler-Institut |  |
| [EPI2131897](https://platform.epicov.org/epi3/start/EPI/2131897) | Germany | 2022-May-03 | [EPI_ISL_14571448](https://platform.epicov.org/epi3/start/EPI_ISL/14571448) | A/great cormorant/Germany-MV/AI02666/2022 | Landesamt für Landwirtschaft, Lebensmittelsicherheit und Fischerei (LALLF) | Friedrich-Loeffler-Institut |  |
| [EPI1882989](https://platform.epicov.org/epi3/start/EPI/1882989) | Denmark | 2020-Nov-04 | [EPI_ISL_984680](https://platform.epicov.org/epi3/start/EPI_ISL/984680) | A/black-headed gull/Denmark/14139-4/2020 | Statens Serumm Institute | Statens Serum Institute | Yuan Liang, Charlotte Hjulsager |
| [EPI2011640](https://platform.epicov.org/epi3/start/EPI/2011640) | Denmark | 2021-Oct-30 | [EPI_ISL_11798569](https://platform.epicov.org/epi3/start/EPI_ISL/11798569) | A/barnacle_goose/Denmark/24342-1.02/2021-10-30 | Statens Serumm Institute | Statens Serum Institute | Charlotte Hjulsager, Yuan Liang |
| [EPI2011632](https://platform.epicov.org/epi3/start/EPI/2011632) | Denmark | 2021-Oct-26 | [EPI_ISL_11798568](https://platform.epicov.org/epi3/start/EPI_ISL/11798568) | A/barnacle_goose/Denmark/24273-1.02/2021-10-26 | Statens Serumm Institute | Statens Serum Institute | Charlotte Hjulsager, Yuan Liang |
| [EPI2011624](https://platform.epicov.org/epi3/start/EPI/2011624) | Denmark | 2021-Apr-18 | [EPI_ISL_11798566](https://platform.epicov.org/epi3/start/EPI_ISL/11798566) | A/barnacle/goose_Denmark/19027-1.02/2021-04-18 | Statens Serumm Institute | Statens Serum Institute | Charlotte Hjulsager, Yuan Liang |
| [EPI1922851](https://platform.epicov.org/epi3/start/EPI/1922851) | Denmark | 2021-Mar-01 | [EPI_ISL_5449305](https://platform.epicov.org/epi3/start/EPI_ISL/5449305) | A/barnacle_goose/Denmark/17572-1.01/2021-03-01 | Statens Serumm Institute | Statens Serum Institute | Hjulsager, C |
| [EPI1883054](https://platform.epicov.org/epi3/start/EPI/1883054) | Denmark | 2020-Nov-07 | [EPI_ISL_984693](https://platform.epicov.org/epi3/start/EPI_ISL/984693) | A/barnacle goose/Denmark/14599-1/2020 | Statens Serumm Institute | Statens Serum Institute | Yuan Liang, Charlotte Hjulsager |
| [EPI1883045](https://platform.epicov.org/epi3/start/EPI/1883045) | Denmark | 2020-Nov-07 | [EPI_ISL_984692](https://platform.epicov.org/epi3/start/EPI_ISL/984692) | A/barnacle goose/Denmark/14600-2/2020 | Statens Serumm Institute | Statens Serum Institute | Yuan Liang, Charlotte Hjulsager |
| [EPI1883021](https://platform.epicov.org/epi3/start/EPI/1883021) | Denmark | 2020-Nov-15 | [EPI_ISL_984688](https://platform.epicov.org/epi3/start/EPI_ISL/984688) | A/barnacle goose/Denmark/14538-1/2020 | Statens Serumm Institute | Statens Serum Institute | Yuan Liang, Charlotte Hjulsager |
| [EPI1883013](https://platform.epicov.org/epi3/start/EPI/1883013) | Denmark | 2020-Nov-05 | [EPI_ISL_984686](https://platform.epicov.org/epi3/start/EPI_ISL/984686) | A/barnacle goose/Denmark/14536-1/2020 | Statens Serumm Institute | Statens Serum Institute | Yuan Liang, Charlotte Hjulsager |
| [EPI1883005](https://platform.epicov.org/epi3/start/EPI/1883005) | Denmark | 2020-Nov-04 | [EPI_ISL_984684](https://platform.epicov.org/epi3/start/EPI_ISL/984684) | A/barnacle goose/Denmark/14537-1/2020 | Statens Serumm Institute | Statens Serum Institute | Yuan Liang, Charlotte Hjulsager |
| [EPI1882997](https://platform.epicov.org/epi3/start/EPI/1882997) | Denmark | 2020-Nov-04 | [EPI_ISL_984681](https://platform.epicov.org/epi3/start/EPI_ISL/984681) | A/barnacle goose/Denmark/14534-1/2020 | Statens Serumm Institute | Statens Serum Institute | Yuan Liang, Charlotte Hjulsager |
| [EPI1882979](https://platform.epicov.org/epi3/start/EPI/1882979) | Denmark | 2020-Nov-04 | [EPI_ISL_984675](https://platform.epicov.org/epi3/start/EPI_ISL/984675) | A/barnacle goose/Denmark/14139-3/2020 | Statens Serumm Institute | Statens Serum Institute | Yuan Liang, Charlotte Hjulsager |
| [EPI1882971](https://platform.epicov.org/epi3/start/EPI/1882971) | Denmark | 2020-Nov-04 | [EPI_ISL_984673](https://platform.epicov.org/epi3/start/EPI_ISL/984673) | A/barnacle goose/Denmark/14139-2/2020 | Statens Serumm Institute | Statens Serum Institute | Yuan Liang, Charlotte Hjulsager |
| [EPI1845829](https://platform.epicov.org/epi3/start/EPI/1845829) | Denmark | 2020-Nov-04 | [EPI_ISL_984670](https://platform.epicov.org/epi3/start/EPI_ISL/984670) | A/barnacle goose/Denmark/14139-1/2020 | Statens Serumm Institute | Statens Serum Institute | Yuan Liang, Charlotte Hjulsager |
| [EPI1813753](https://platform.epicov.org/epi3/start/EPI/1813753) | Denmark | 2020-Nov-04 | [EPI_ISL_644824](https://platform.epicov.org/epi3/start/EPI_ISL/644824) | A/barnacle goose/Denmark/14138-1/2020-11-04(H5N8) | Statens Serumm Institute | Statens Serum Institute | Charlotte,Hjulsager |
| [EPI2244154](https://platform.epicov.org/epi3/start/EPI/2244154) | Denmark | 2022-Apr-20 | [EPI_ISL_16113089](https://platform.epicov.org/epi3/start/EPI_ISL/16113089) | A/barnacle_goose/Denmark/03332-1.02/2022 | Statens Serum Institute | Statens Serum Institute | Hjulsager,Charlotte; Liang,Yuan |
| [EPI2009959](https://platform.epicov.org/epi3/start/EPI/2009959) | Germany | 2021-Oct-26 | [EPI_ISL_11725991](https://platform.epicov.org/epi3/start/EPI_ISL/11725991) | A/barnacle goose/Germany-MV/AI06175/2021 | Landesamt für Landwirtschaft, Lebensmittelsicherheit und Fischerei (LALLF) | Friedrich-Loeffler-Institut |  |
| [EPI1943846](https://platform.epicov.org/epi3/start/EPI/1943846) | Germany | 2021-Apr-14 | [EPI_ISL_5146291](https://platform.epicov.org/epi3/start/EPI_ISL/5146291) | A/barnacle goose/Germany-NI/AI03980/2021 | Lebensmittel- und Veterinärinstitut Oldenburg - Standort Veterinärinstitut | Friedrich-Loeffler-Institut |  |
| [EPI1943856](https://platform.epicov.org/epi3/start/EPI/1943856) | Germany | 2021-Apr-08 | [EPI_ISL_5145422](https://platform.epicov.org/epi3/start/EPI_ISL/5145422) | A/barnacle goose/Germany-NI/AI03914/2021 | Lebensmittel- und Veterinärinstitut Oldenburg - Standort Veterinärinstitut | Friedrich-Loeffler-Institut |  |
| [EPI1944198](https://platform.epicov.org/epi3/start/EPI/1944198) | Germany | 2021-Feb-17 | [EPI_ISL_5099456](https://platform.epicov.org/epi3/start/EPI_ISL/5099456) | A/barnacle goose/Germany-NI/AI01605/2021 | Lebensmittel- und Veterinärinstitut Oldenburg - Standort Veterinärinstitut | Friedrich-Loeffler-Institut |  |
| [EPI1954414](https://platform.epicov.org/epi3/start/EPI/1954414) | Germany | 2020-Nov-06 | [EPI_ISL_5063706](https://platform.epicov.org/epi3/start/EPI_ISL/5063706) | A/barnacle goose/Germany-SH/AI02379/2020 | Landeslabor Schleswig-Holstein | Friedrich-Loeffler-Institut |  |
| [EPI1954426](https://platform.epicov.org/epi3/start/EPI/1954426) | Germany | 2020-Nov-03 | [EPI_ISL_5060031](https://platform.epicov.org/epi3/start/EPI_ISL/5060031) | A/barnacle goose/Germany-SH/AI02199/2020 | Landeslabor Schleswig-Holstein | Friedrich-Loeffler-Institut |  |
| [EPI1919628](https://platform.epicov.org/epi3/start/EPI/1919628) | Germany | 2020-Nov-02 | [EPI_ISL_5058432](https://platform.epicov.org/epi3/start/EPI_ISL/5058432) | A/barnacle goose/Germany-SH/AI02190/2020 | Landeslabor Schleswig-Holstein | Friedrich-Loeffler-Institut |  |
| [EPI1919606](https://platform.epicov.org/epi3/start/EPI/1919606) | Germany | 2020-Nov-01 | [EPI_ISL_5057963](https://platform.epicov.org/epi3/start/EPI_ISL/5057963) | A/barnacle goose/Germany-SH/AI02180/2020 | Landeslabor Schleswig-Holstein | Friedrich-Loeffler-Institut |  |
| [EPI1919585](https://platform.epicov.org/epi3/start/EPI/1919585) | Germany | 2020-Oct-30 | [EPI_ISL_5057874](https://platform.epicov.org/epi3/start/EPI_ISL/5057874) | A/barnacle goose/Germany-SH/AI02172/2020 | Landeslabor Schleswig-Holstein | Friedrich-Loeffler-Institut |  |
| [EPI1919569](https://platform.epicov.org/epi3/start/EPI/1919569) | Germany | 2020-Oct-28 | [EPI_ISL_5057844](https://platform.epicov.org/epi3/start/EPI_ISL/5057844) | A/barnacle goose/Germany-SH/AI02168/2020 | Landeslabor Schleswig-Holstein | Friedrich-Loeffler-Institut |  |
| [EPI1811572](https://platform.epicov.org/epi3/start/EPI/1811572) | Germany | 2020-Oct-28 | [EPI_ISL_614400](https://platform.epicov.org/epi3/start/EPI_ISL/614400) | A/barnacle goose/Germany-SH/AI02167/2020 | Landeslabor Schleswig-Holstein | Friedrich-Loeffler-Institut |  |
| [EPI1987373](https://platform.epicov.org/epi3/start/EPI/1987373) | Germany | 2022-Jan-24 | [EPI_ISL_10261376](https://platform.epicov.org/epi3/start/EPI_ISL/10261376) | A/pigeon/Germany-NW/AI00951/2022 | Chemisches- und Veterinäruntersuchungsamt Westfalen | Friedrich-Loeffler-Institut |  |
| [EPI2015045](https://platform.epicov.org/epi3/start/EPI/2015045) | Denmark | 2021-Oct-16 | [EPI_ISL_11798573](https://platform.epicov.org/epi3/start/EPI_ISL/11798573) | A/Eurasian_teal/Denmark/24115-2/2021-10-16 | Statens Serumm Institute | Statens Serum Institute | Charlotte Hjulsager, Yuan Liang |
| [EPI1954391](https://platform.epicov.org/epi3/start/EPI/1954391) | Germany | 2020-Dec-21 | [EPI_ISL_5095550](https://platform.epicov.org/epi3/start/EPI_ISL/5095550) | A/bean goose/Germany-BB/AI00444/2021 | Landeslabor Berlin-Brandenburg | Friedrich-Loeffler-Institut |  |
| [EPI1883976](https://platform.epicov.org/epi3/start/EPI/1883976) | Hungary | 2021-Apr-13 | [EPI_ISL_3135897](https://platform.epicov.org/epi3/start/EPI_ISL/3135897) | A/Turkey/Hungary/16603/2021 (H5N1) | National Food Chain Safety Office Veterinary Diagnostic Directorate Laboratory for Molecular Biology | National Food Chain Safety Office, Hungary | Katalin,Szentpáli-Gavallér;Ádám,Bálint;Krisztina,Ursu;Péter,Malik |
